# Supplementary material
Source: PubMed Central journal article supplement (PMC5083132)

# Supplementary Figure 2 - Strikoudis et al.

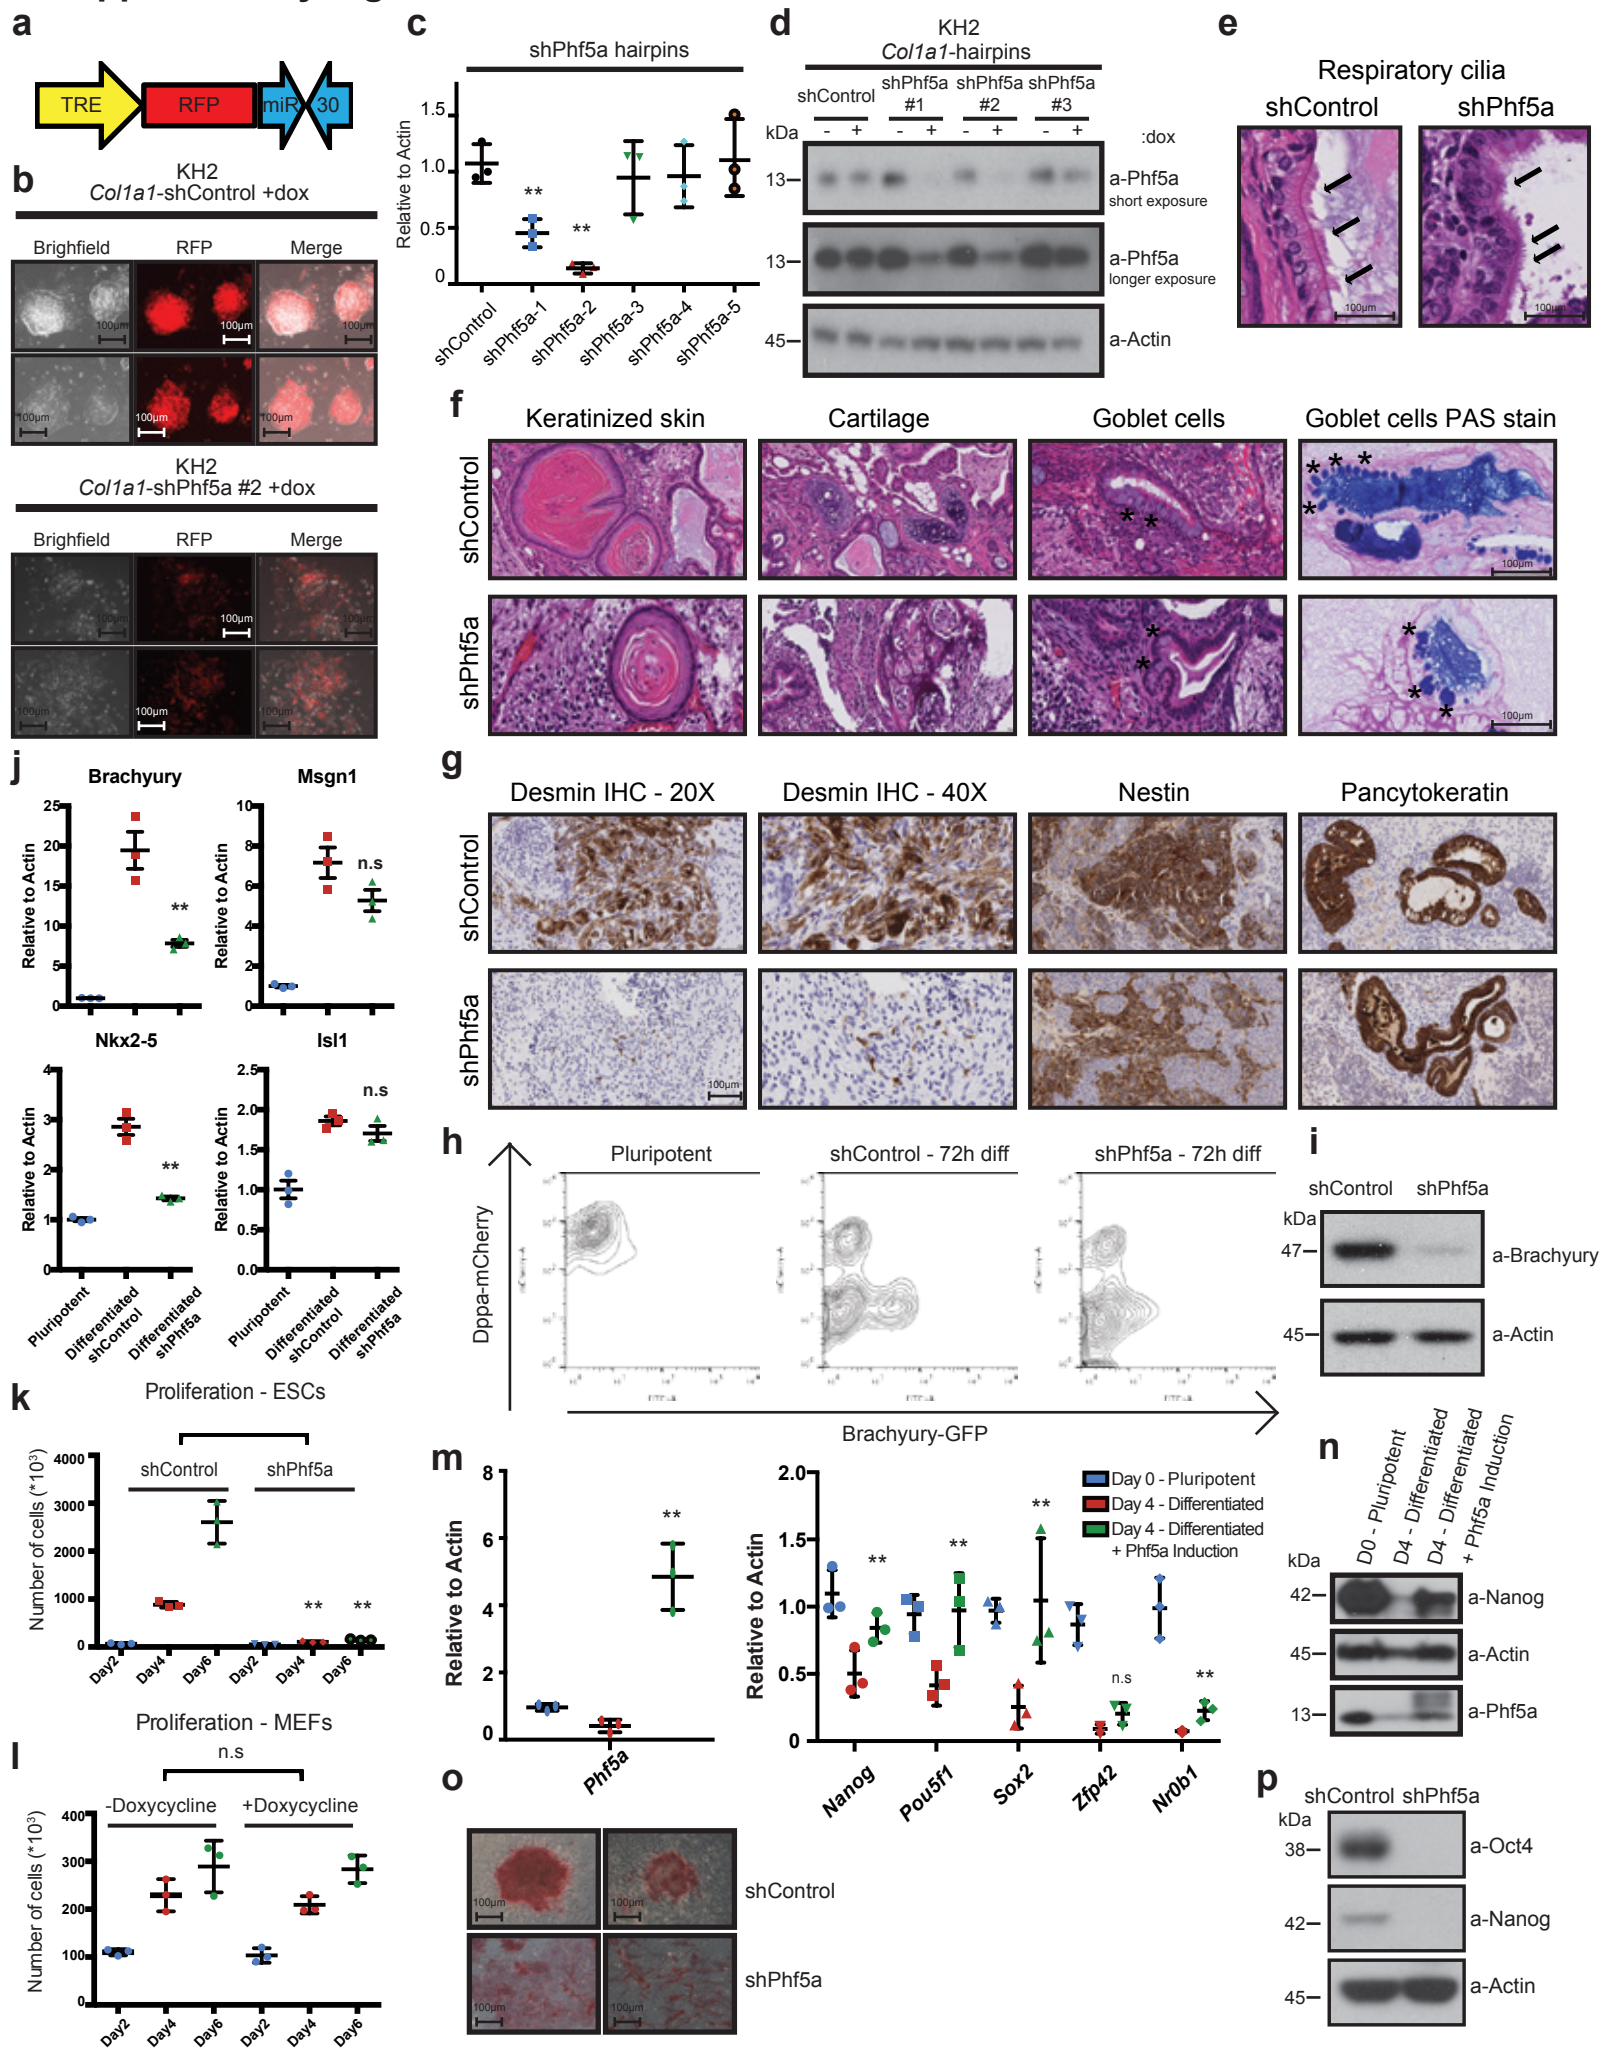

Supplement: NIHMS817260-supplement-3.pdf [file NIHMS817260-supplement-3.pdf]

# Supplementary Figure 3 - Strikoudis et al.

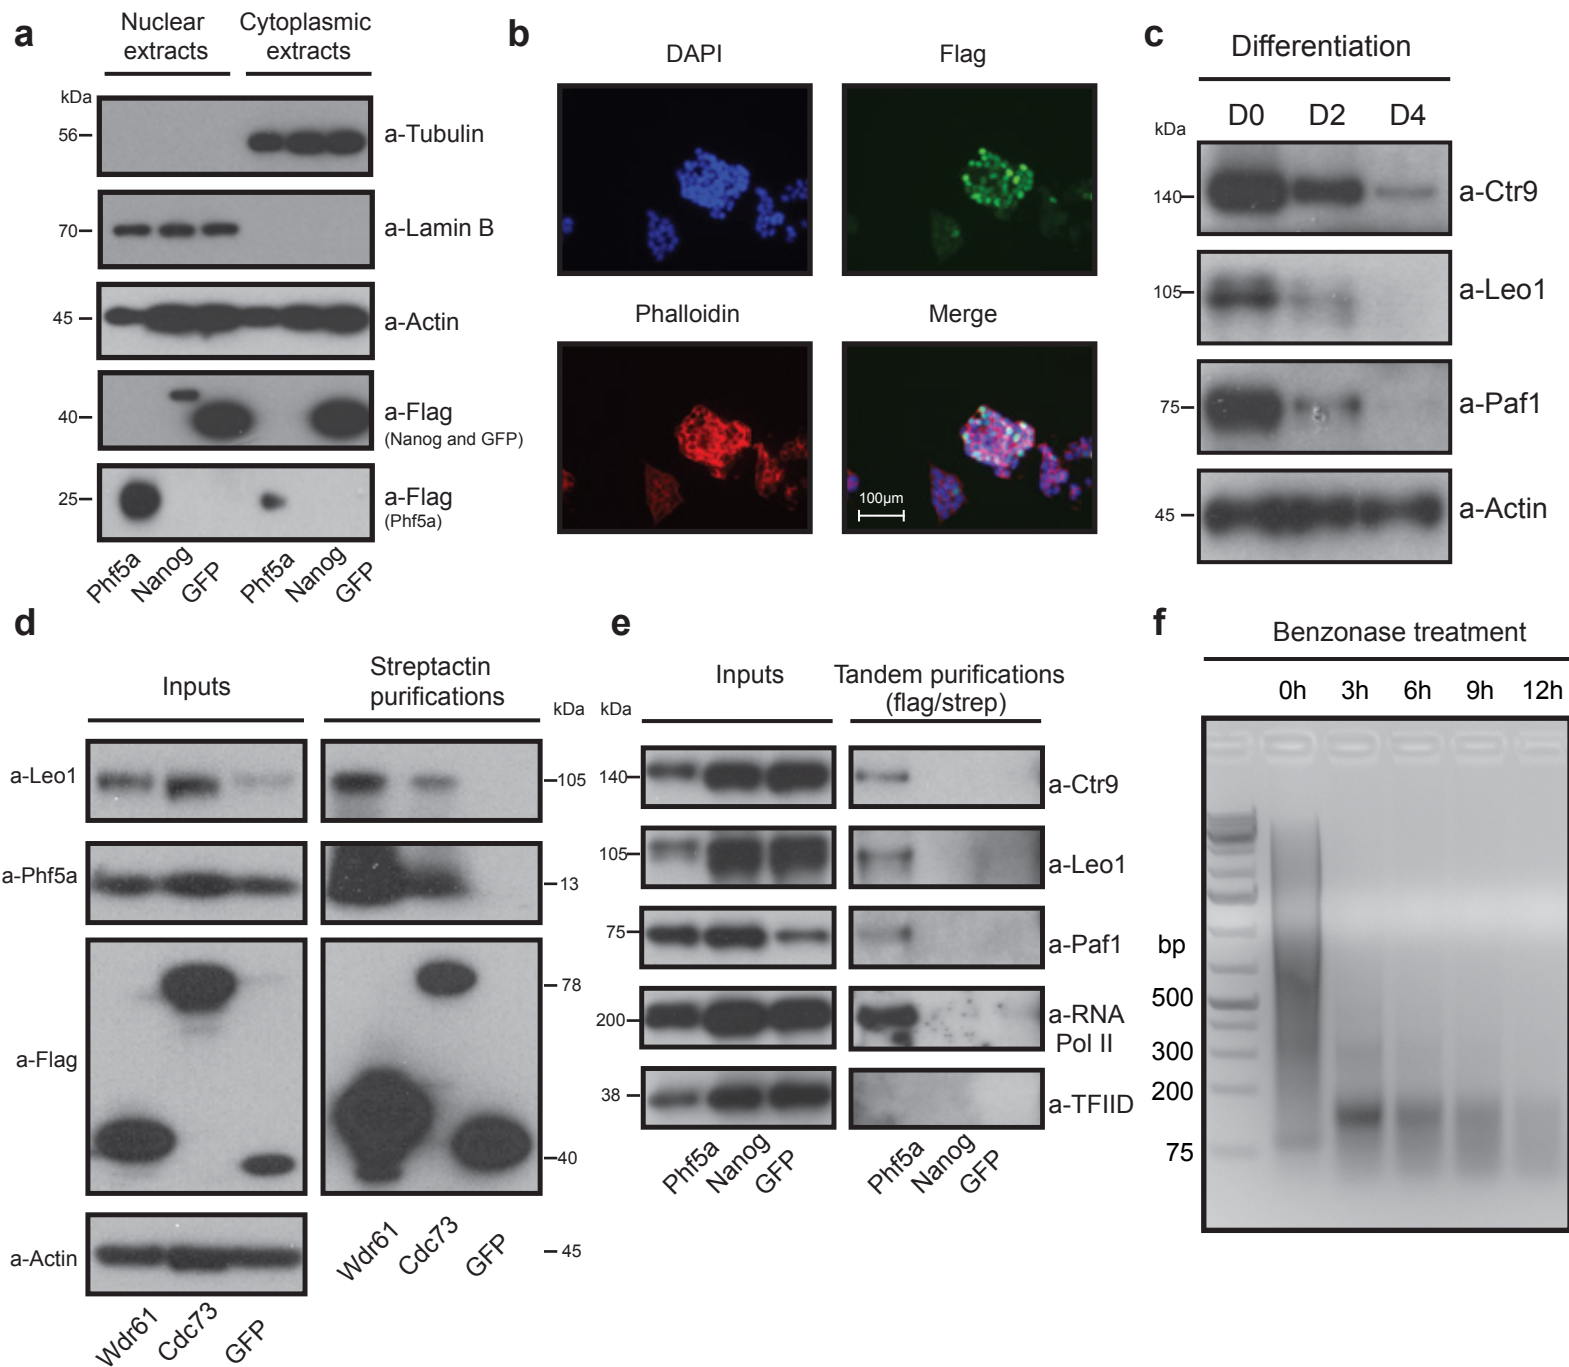

Supplement: NIHMS817260-supplement-4.pdf [file NIHMS817260-supplement-4.pdf]

# Supplementary Figure 4 - Strikoudis et al.

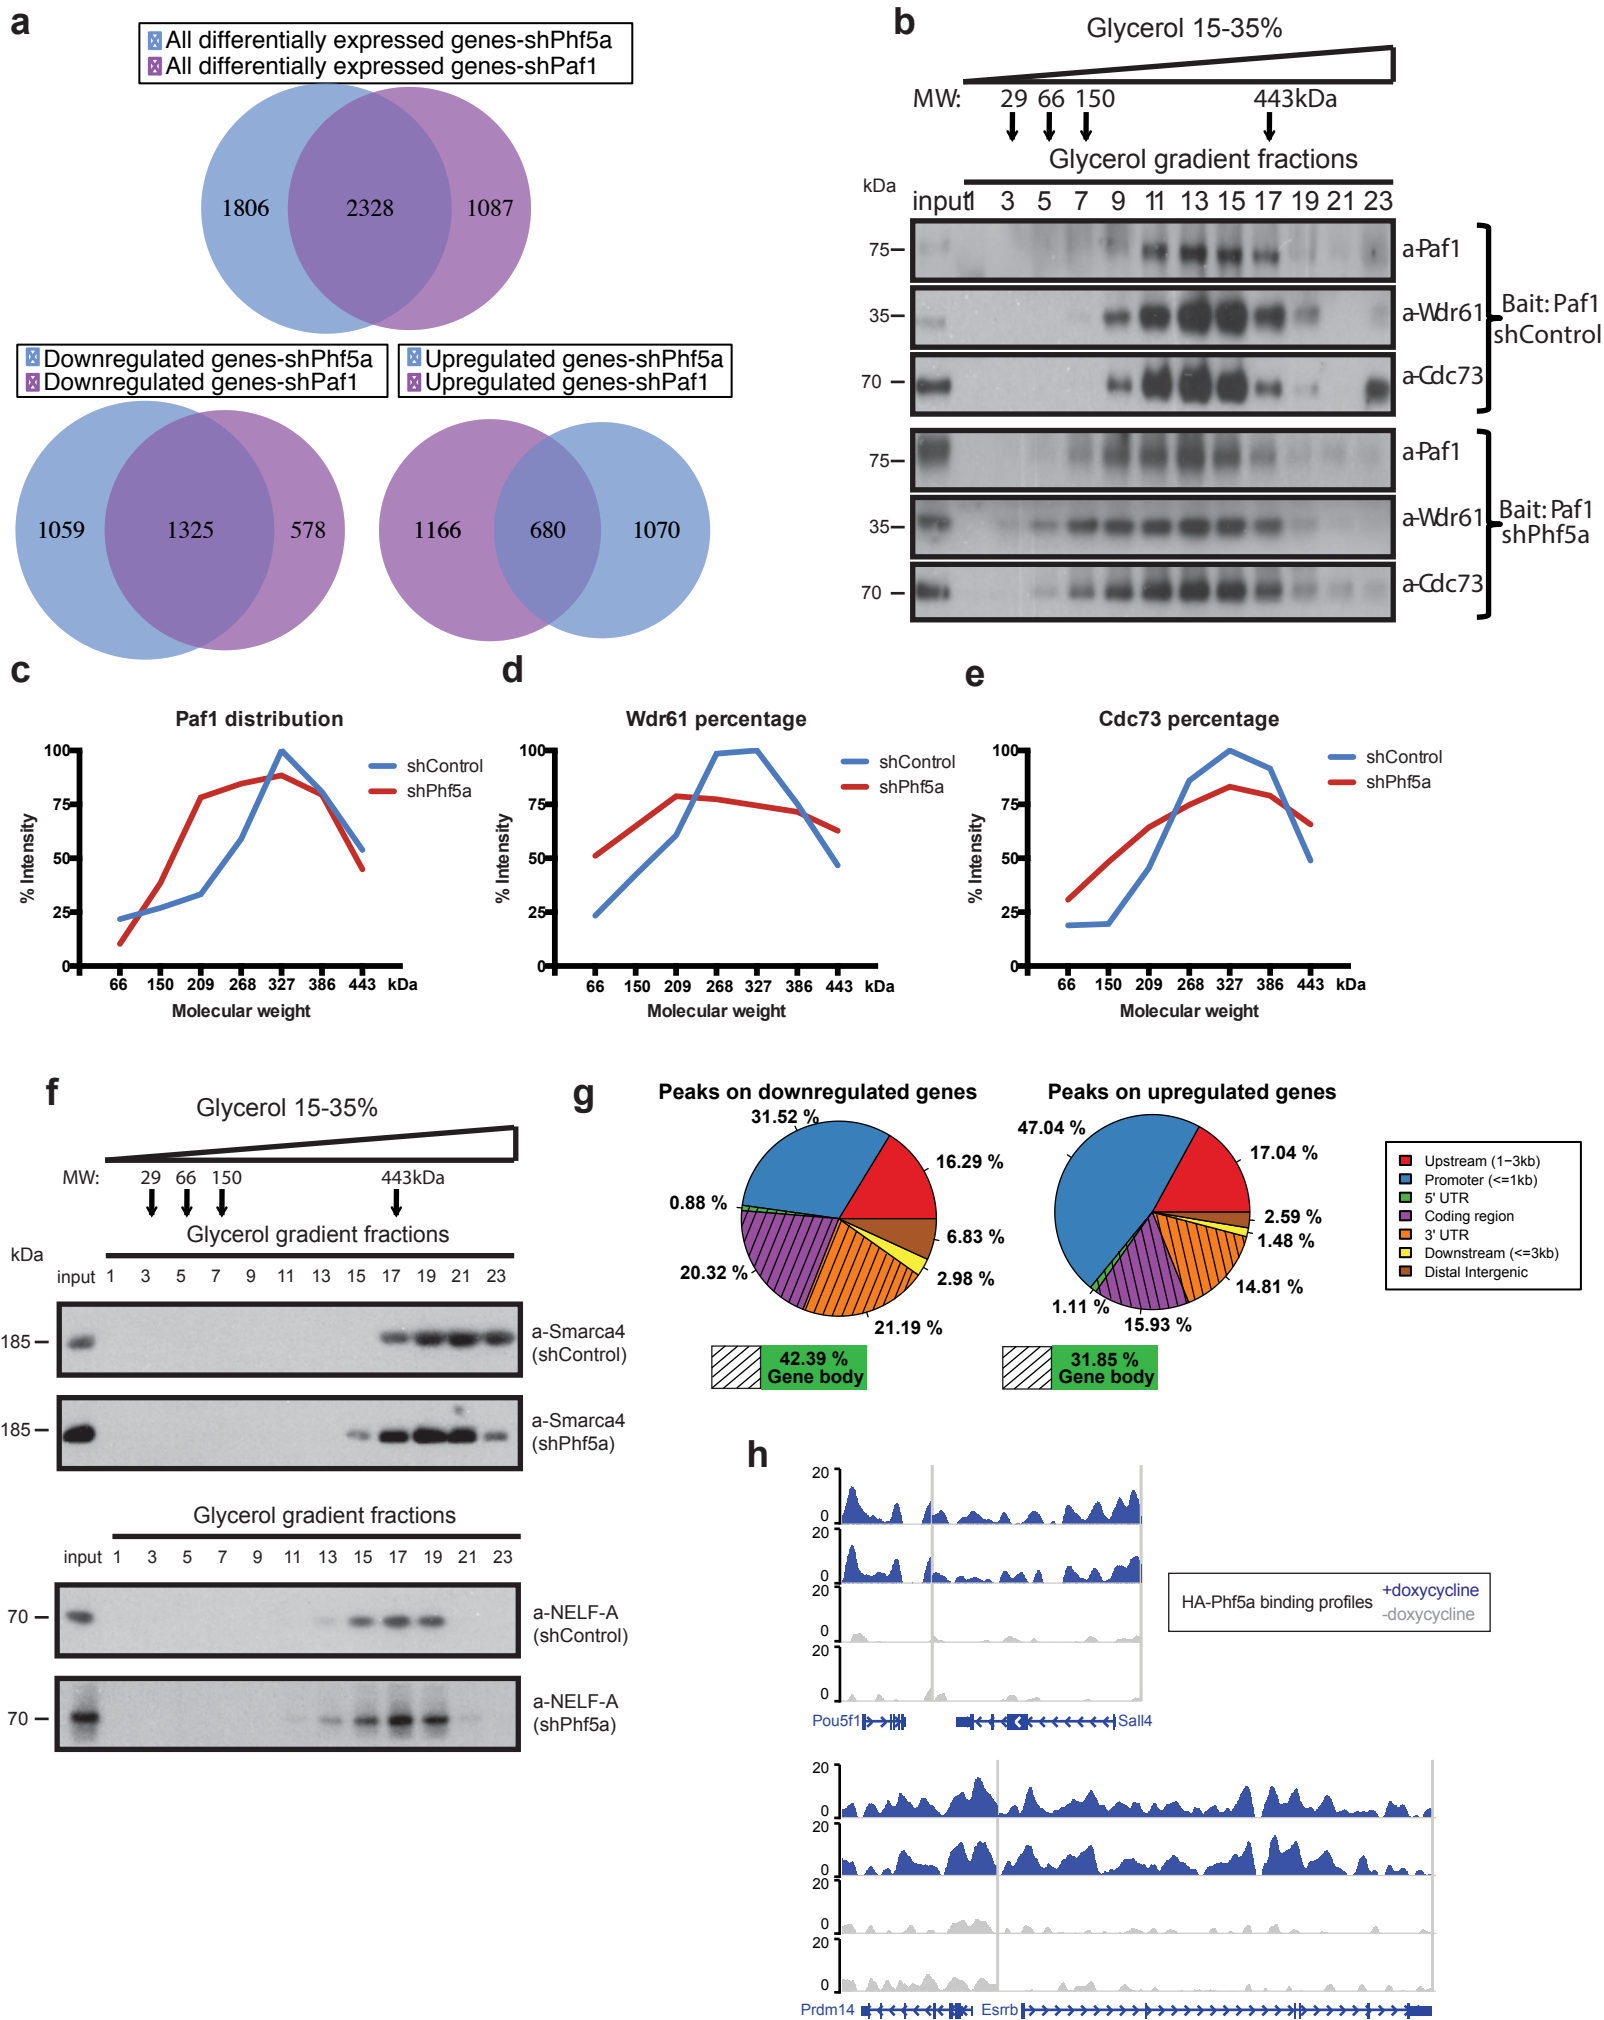

Supplement: NIHMS817260-supplement-5.pdf [file NIHMS817260-supplement-5.pdf]

# Supplementary Figure 5 - Strikoudis et al.

**a**

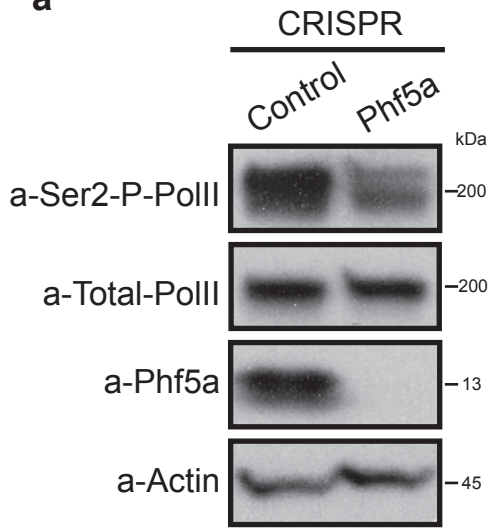

**b**

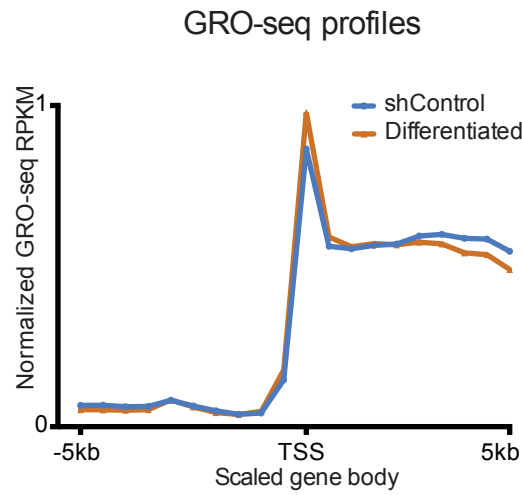

**c**

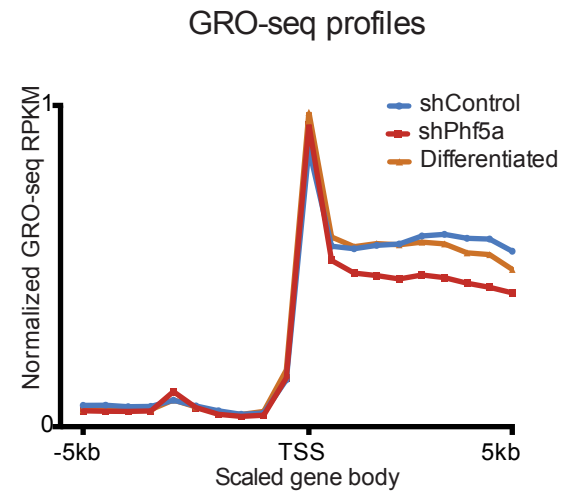

**d**

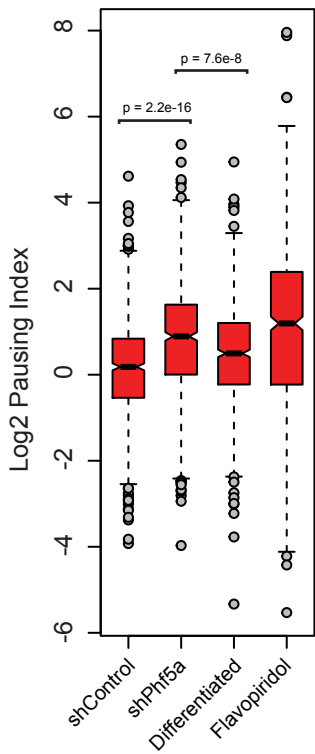

**e**

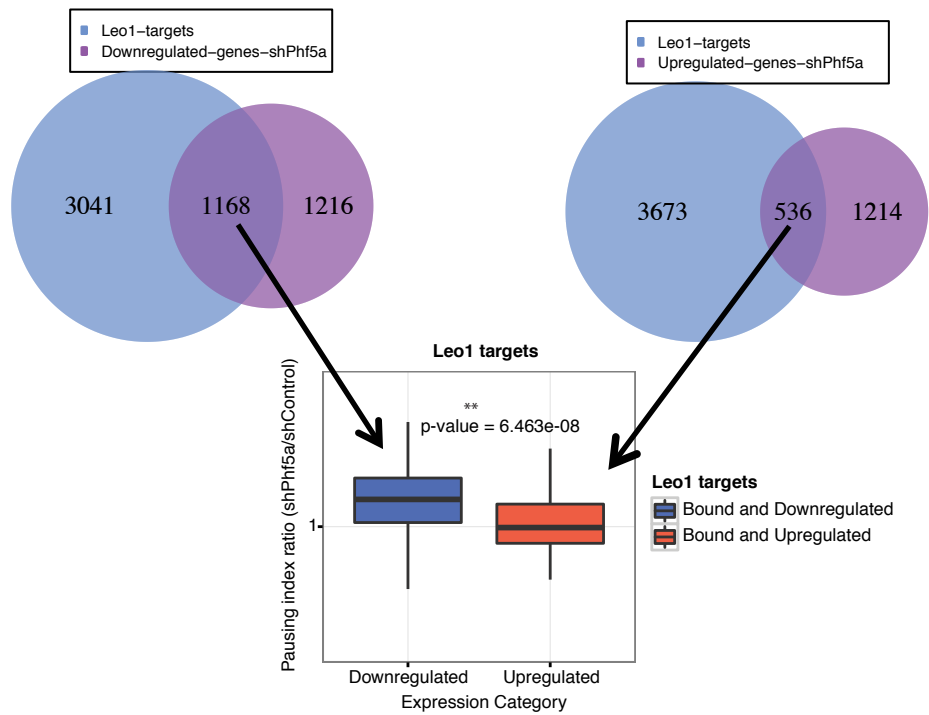

**f**

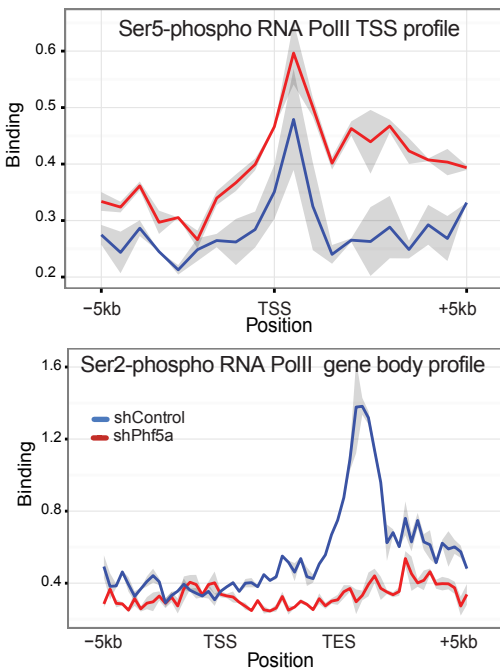

**g**

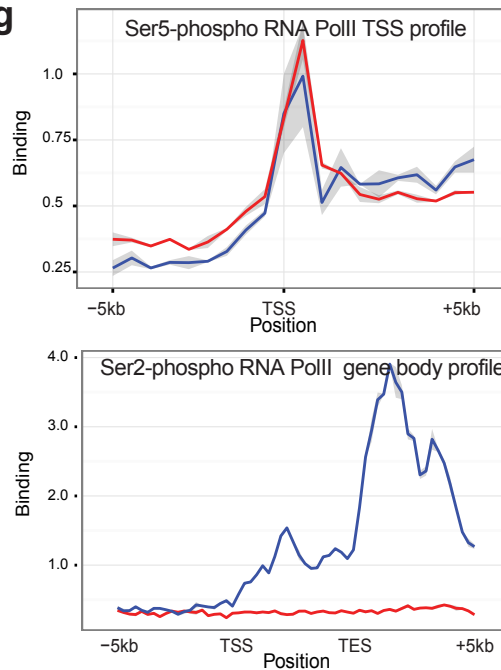

Supplement: NIHMS817260-supplement-6.pdf [file NIHMS817260-supplement-6.pdf]

Supplementary Figure 6 - Strikoudis et al.

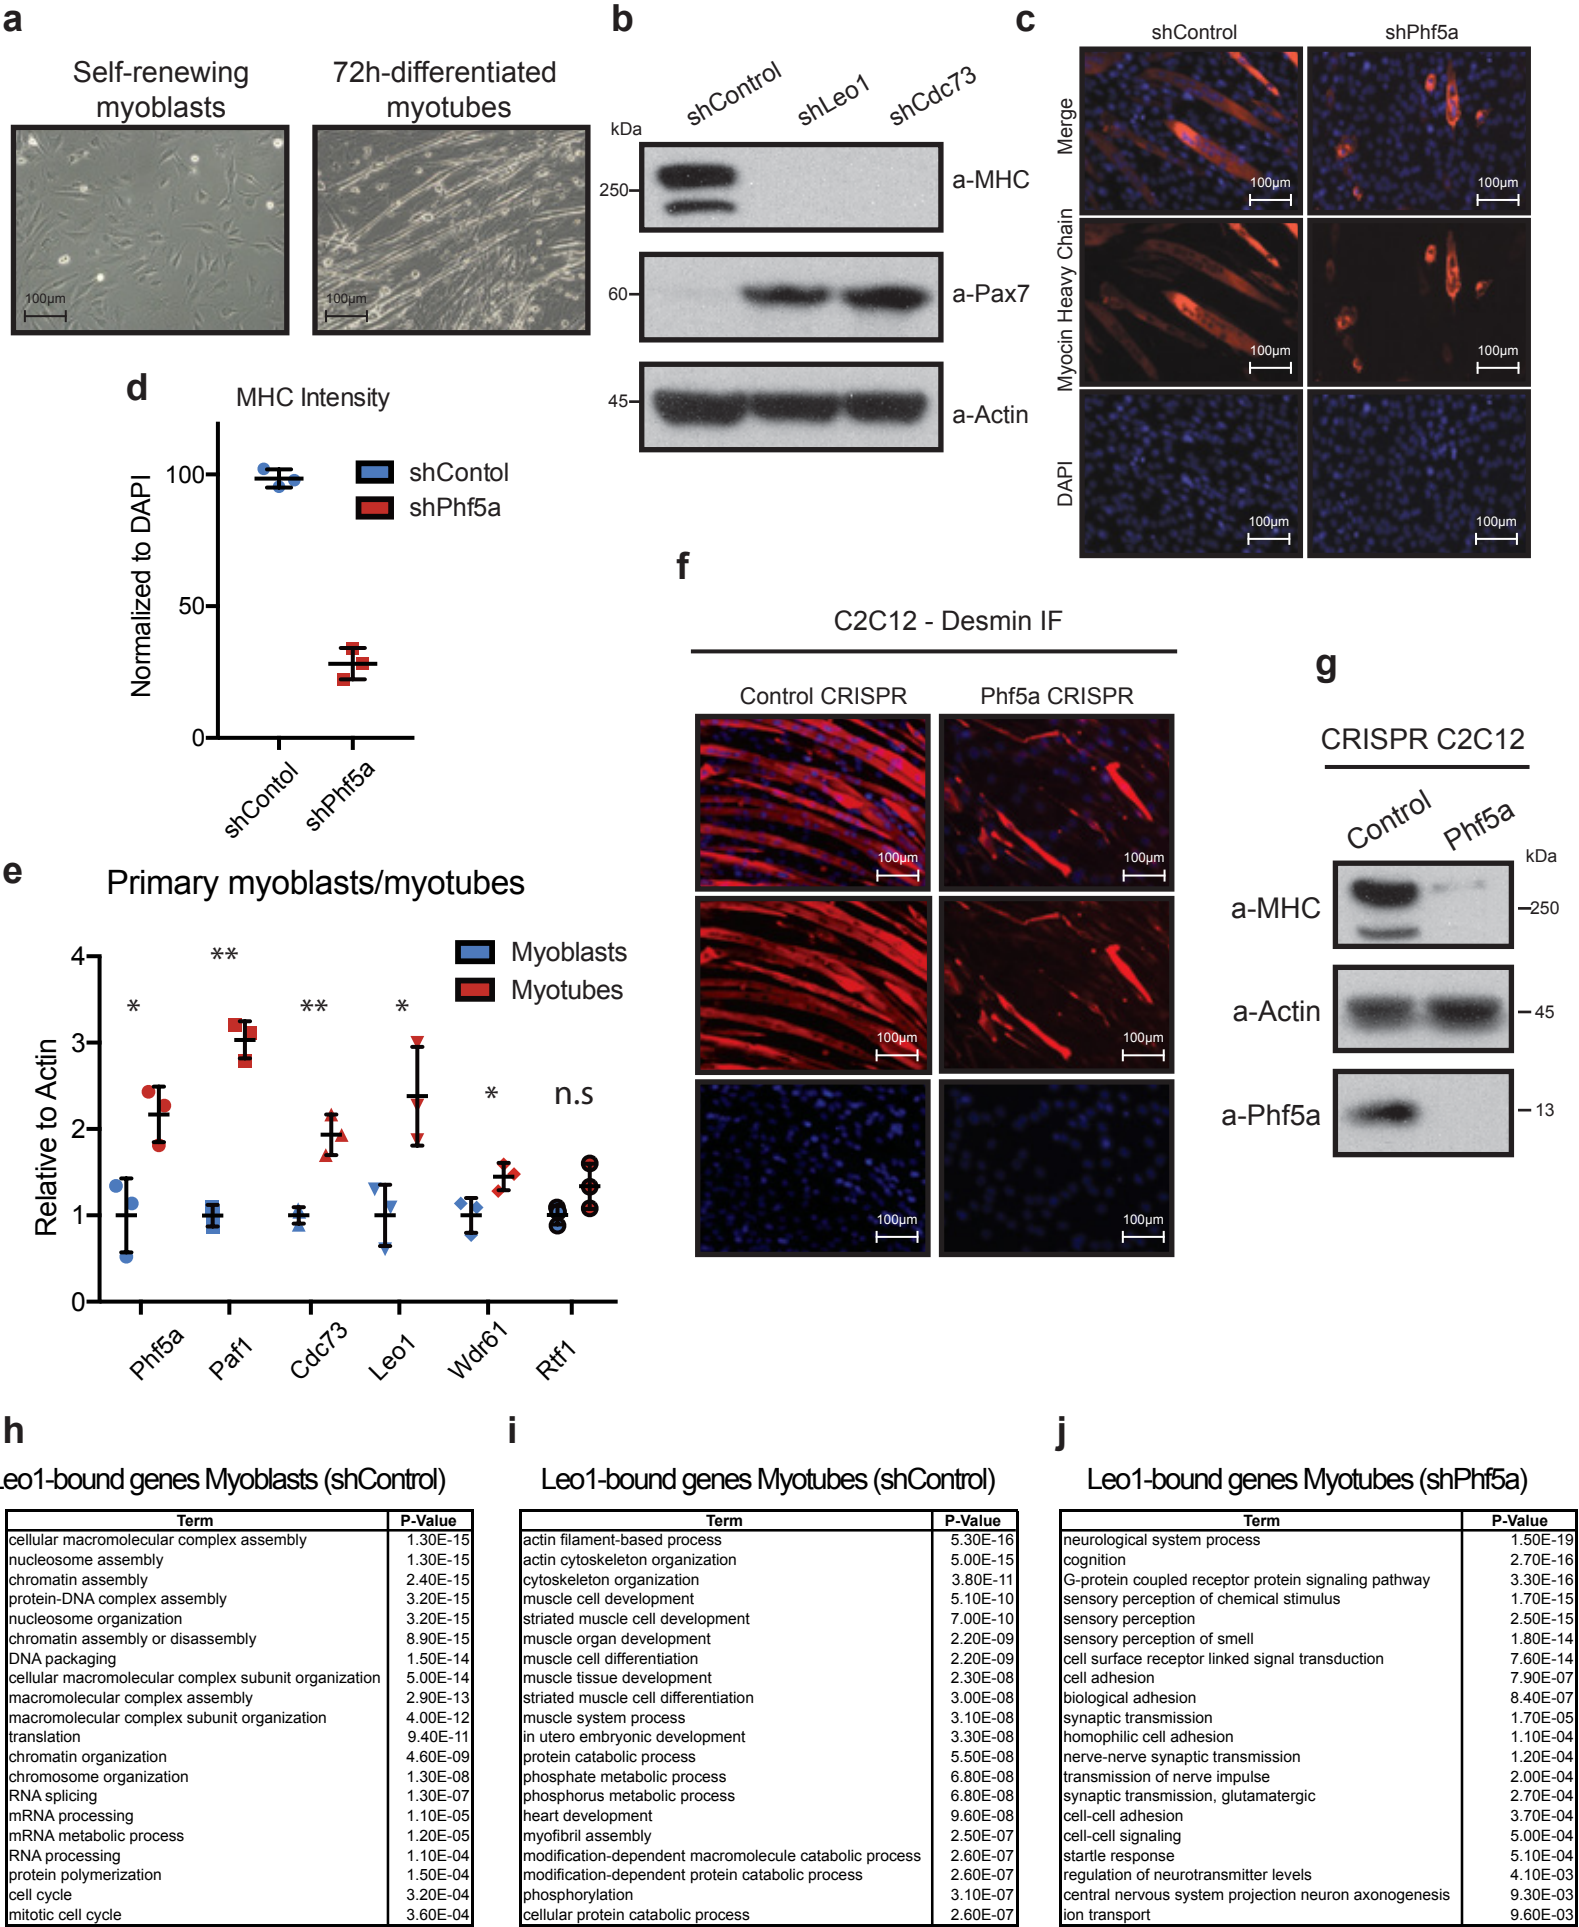

Supplement: NIHMS817260-supplement-7.pdf [file NIHMS817260-supplement-7.pdf]

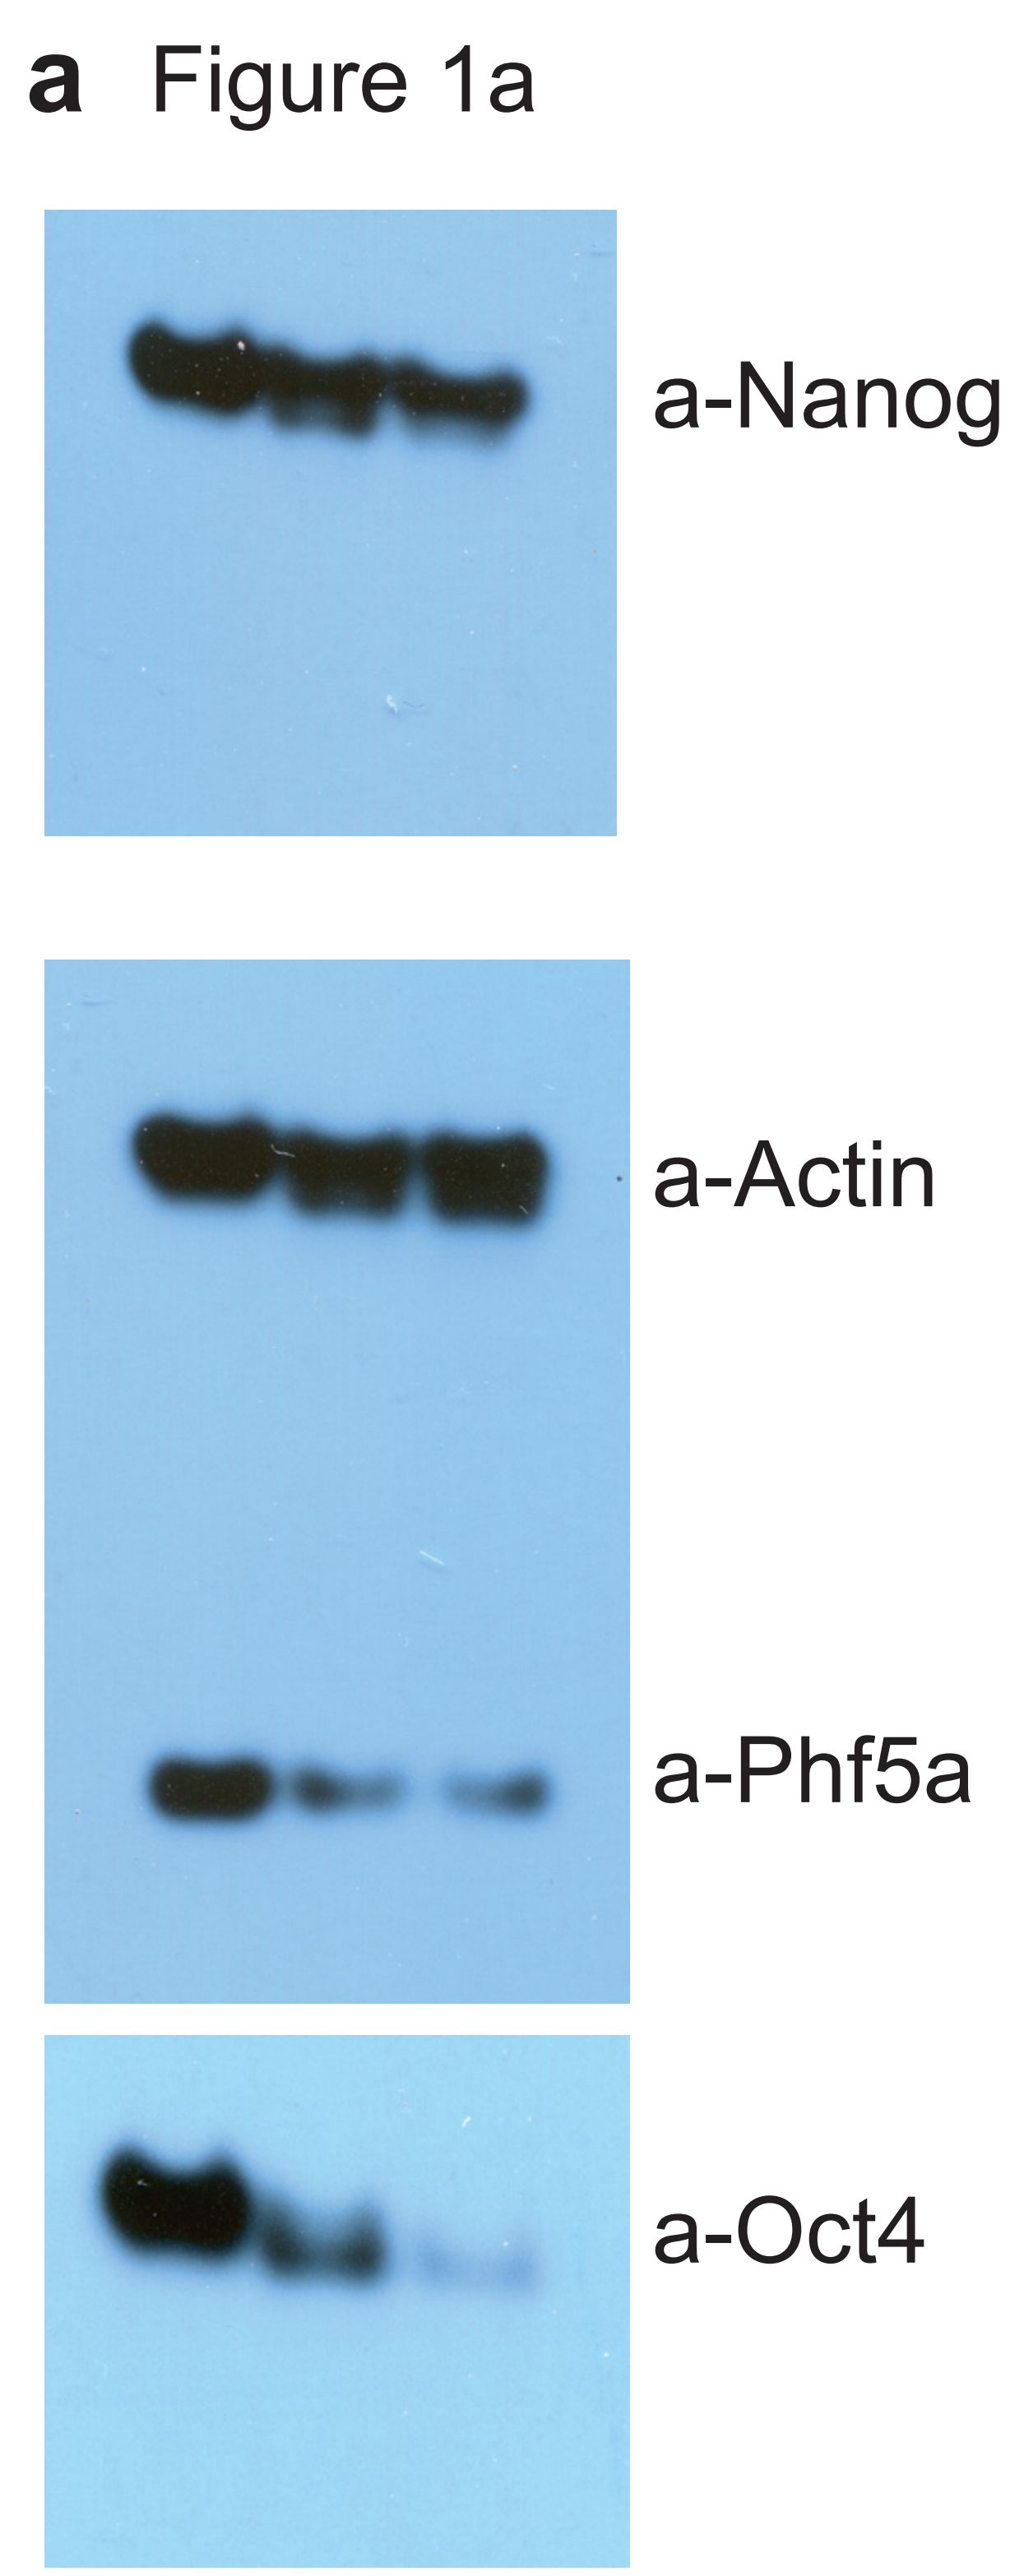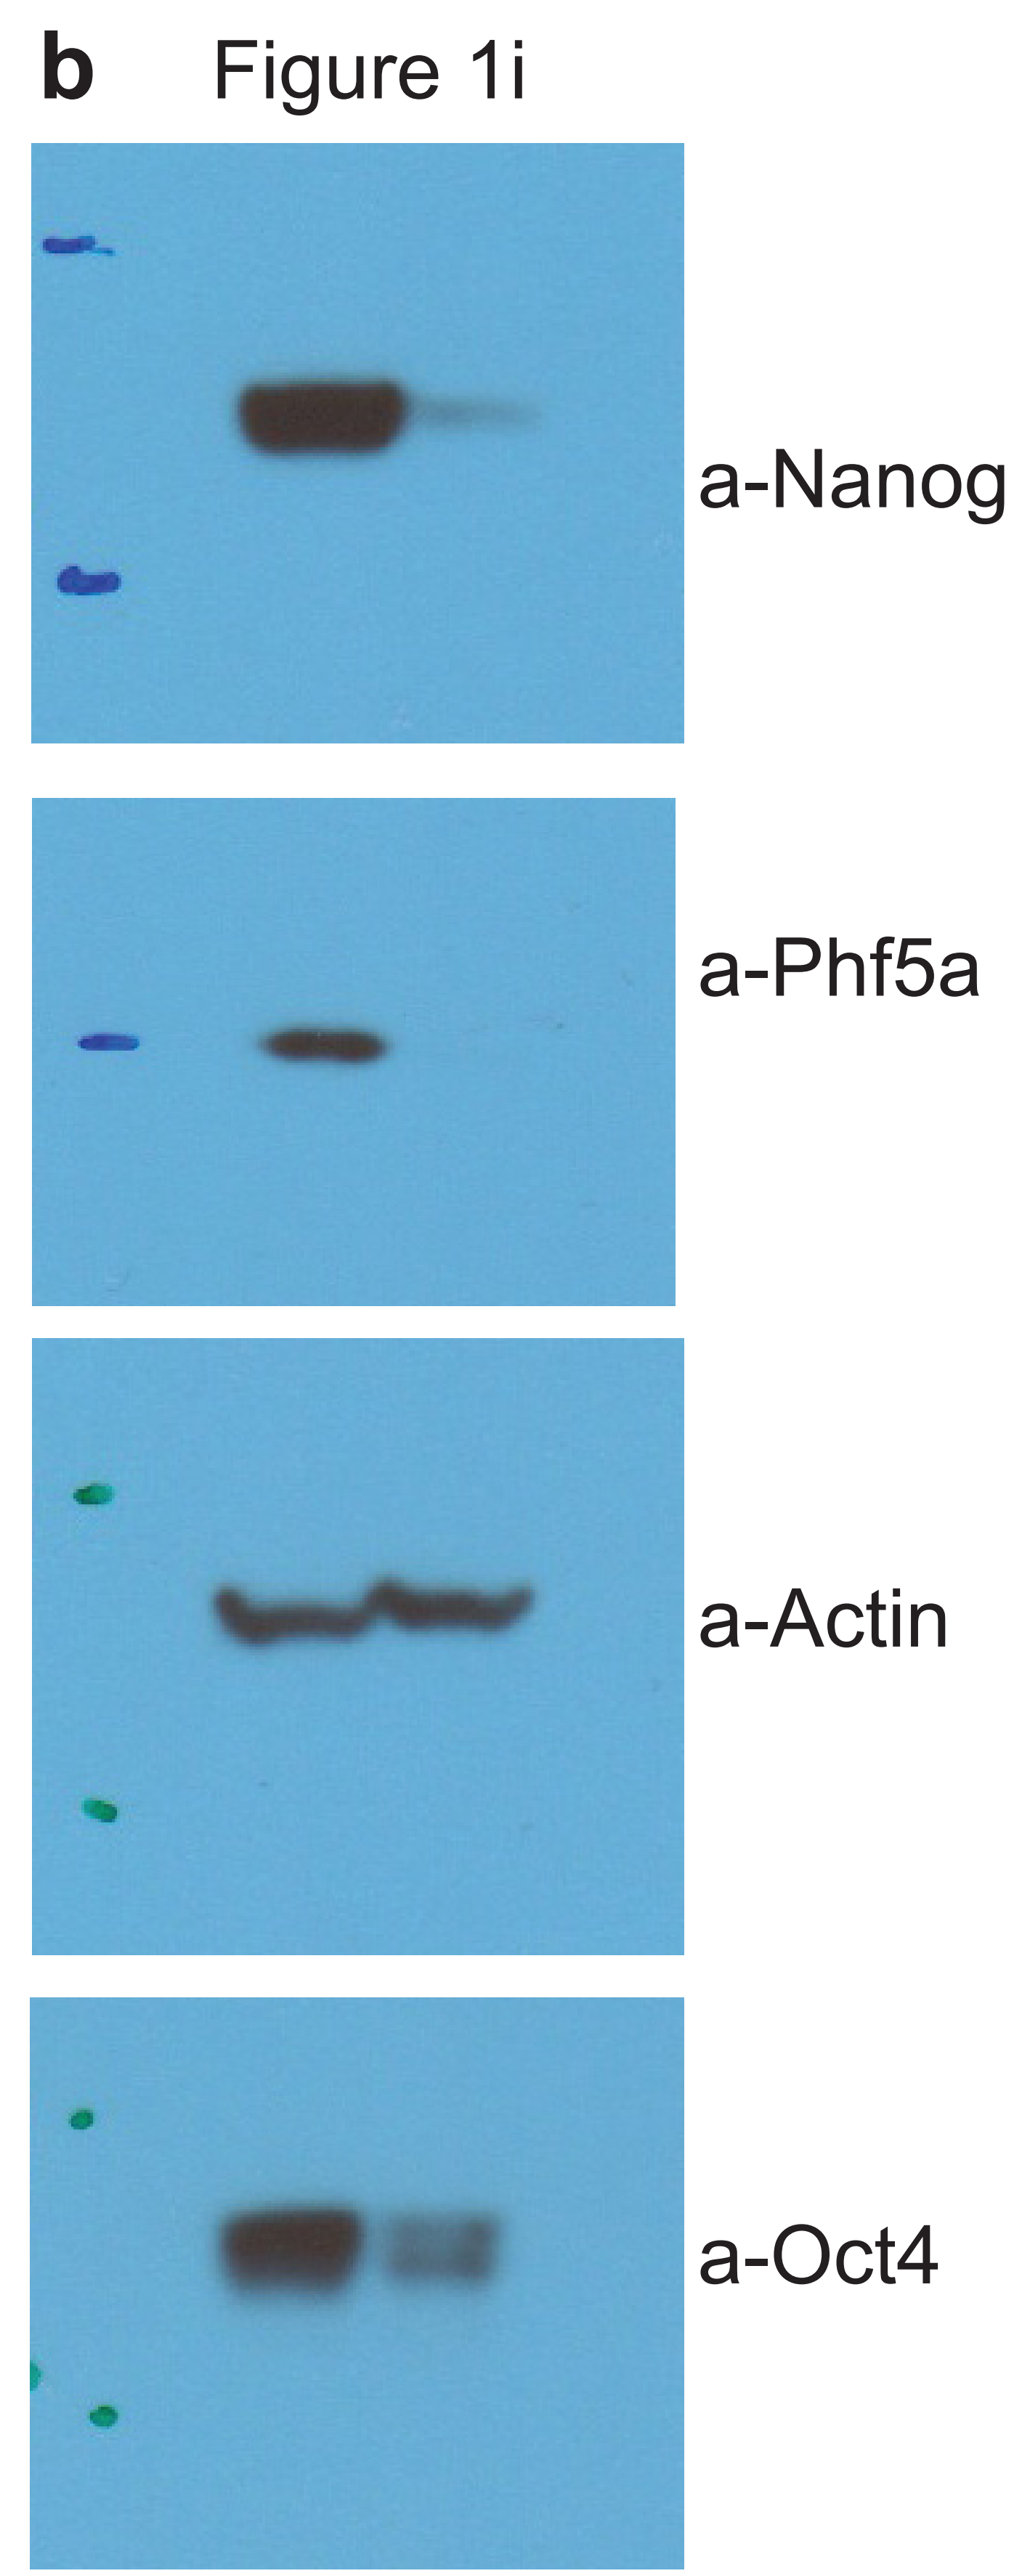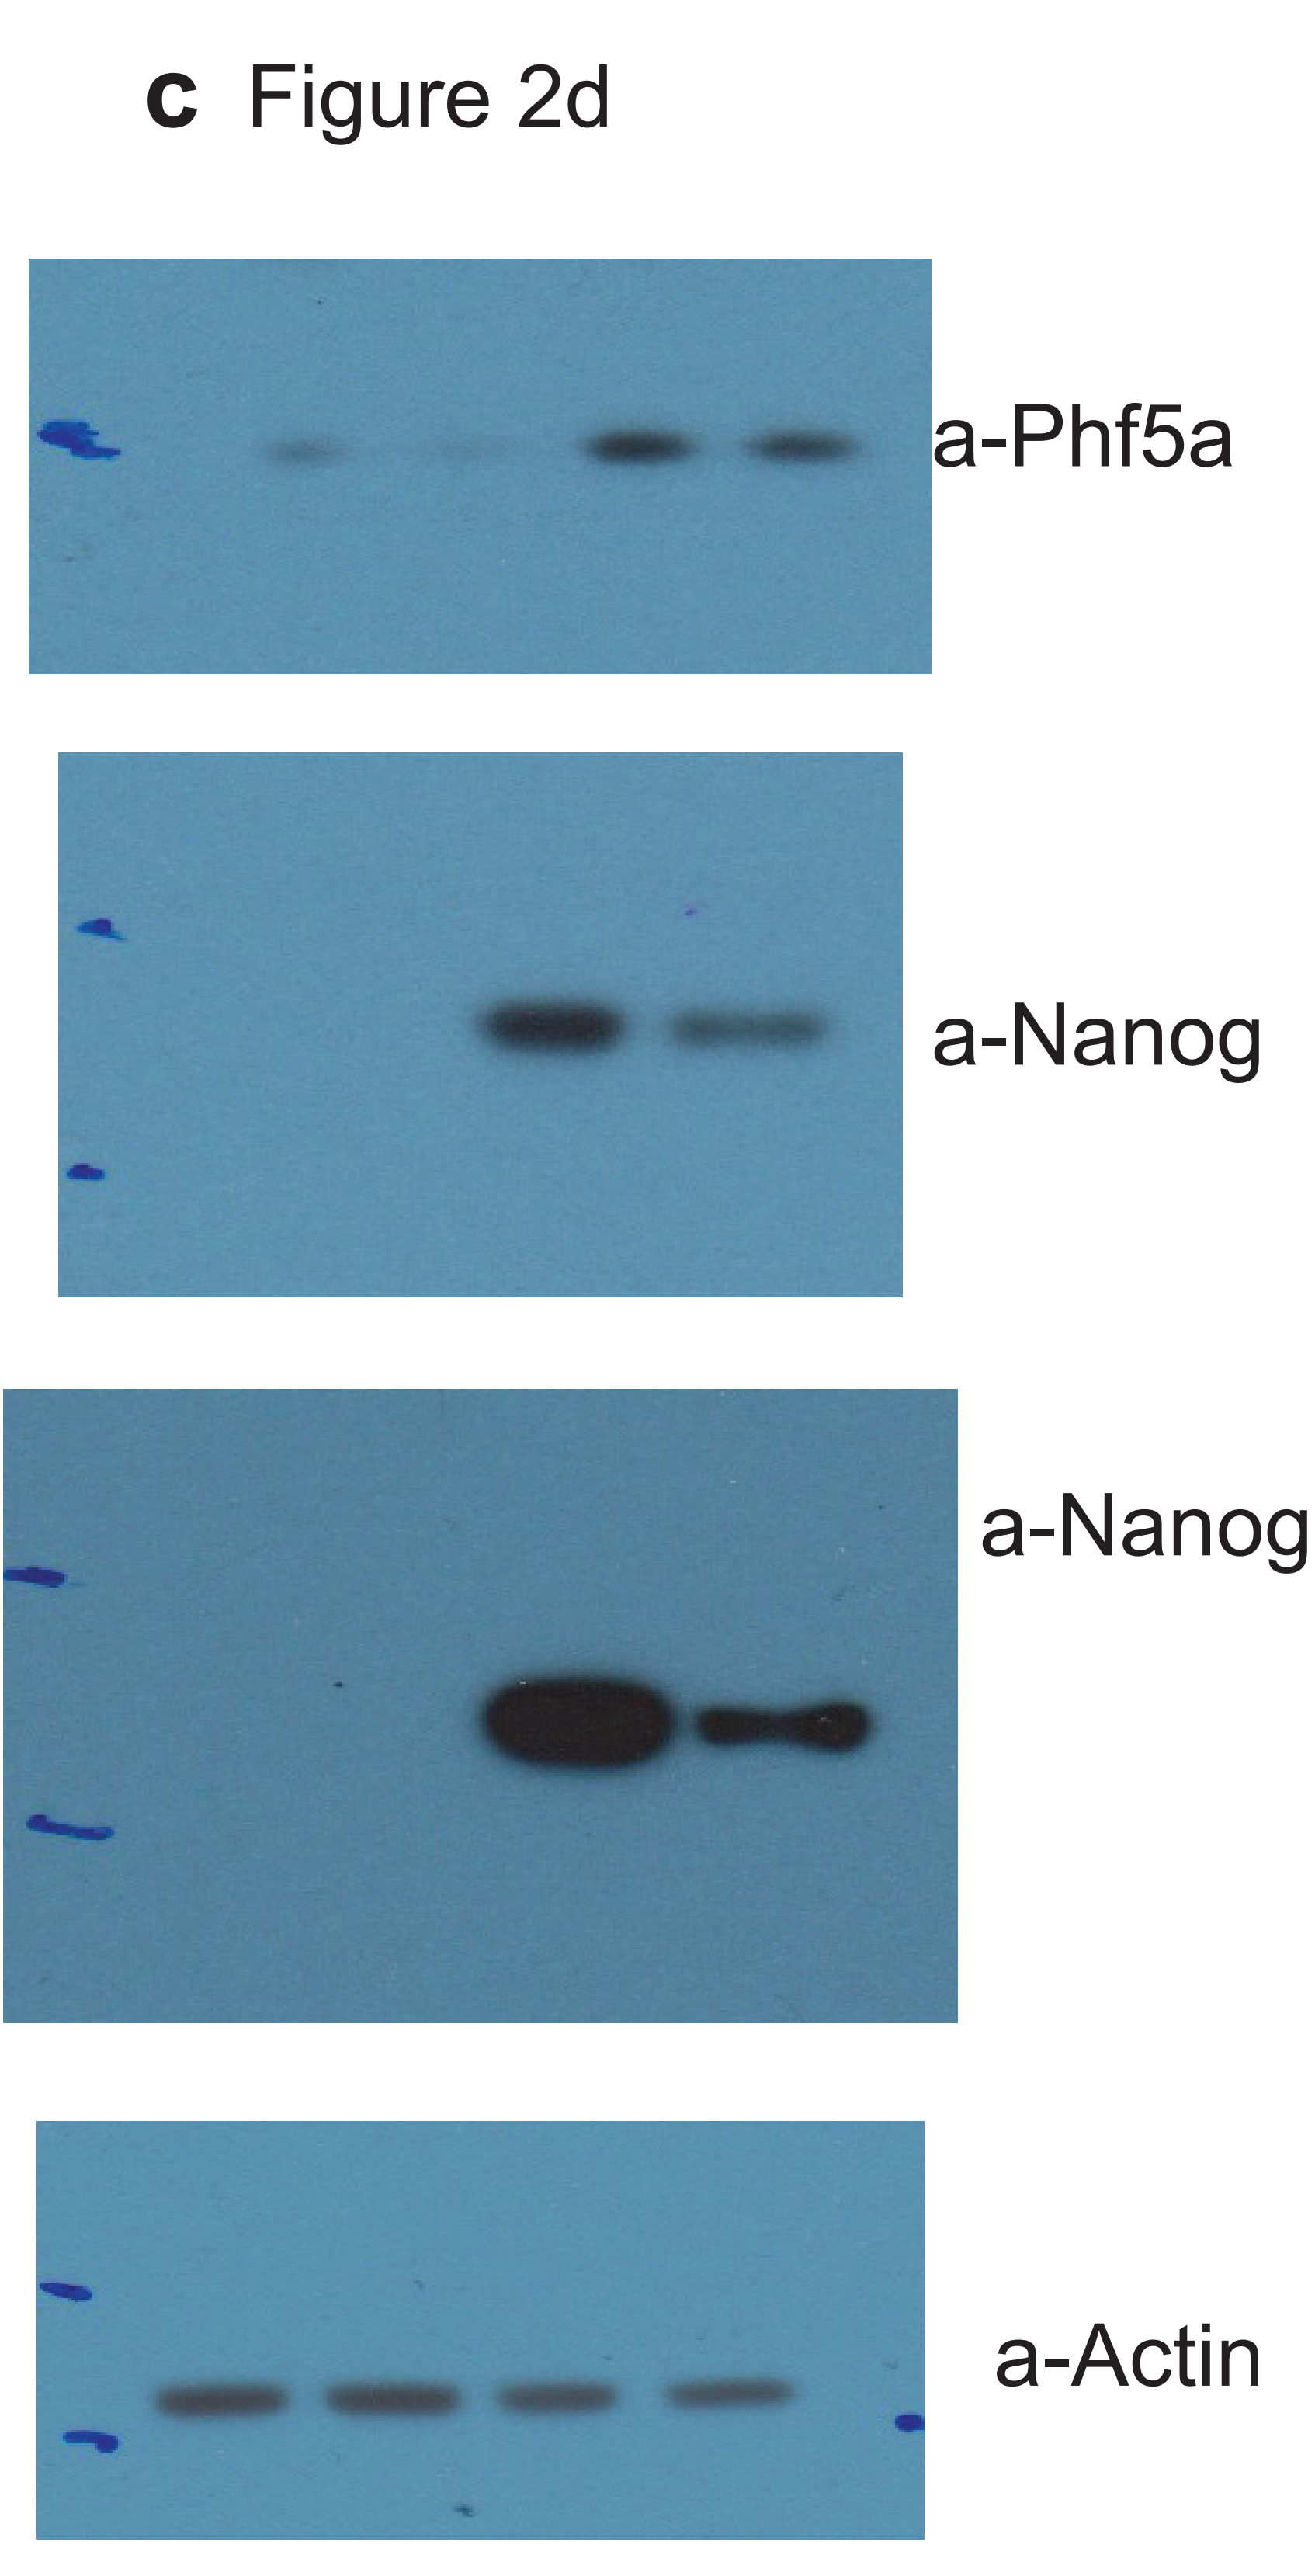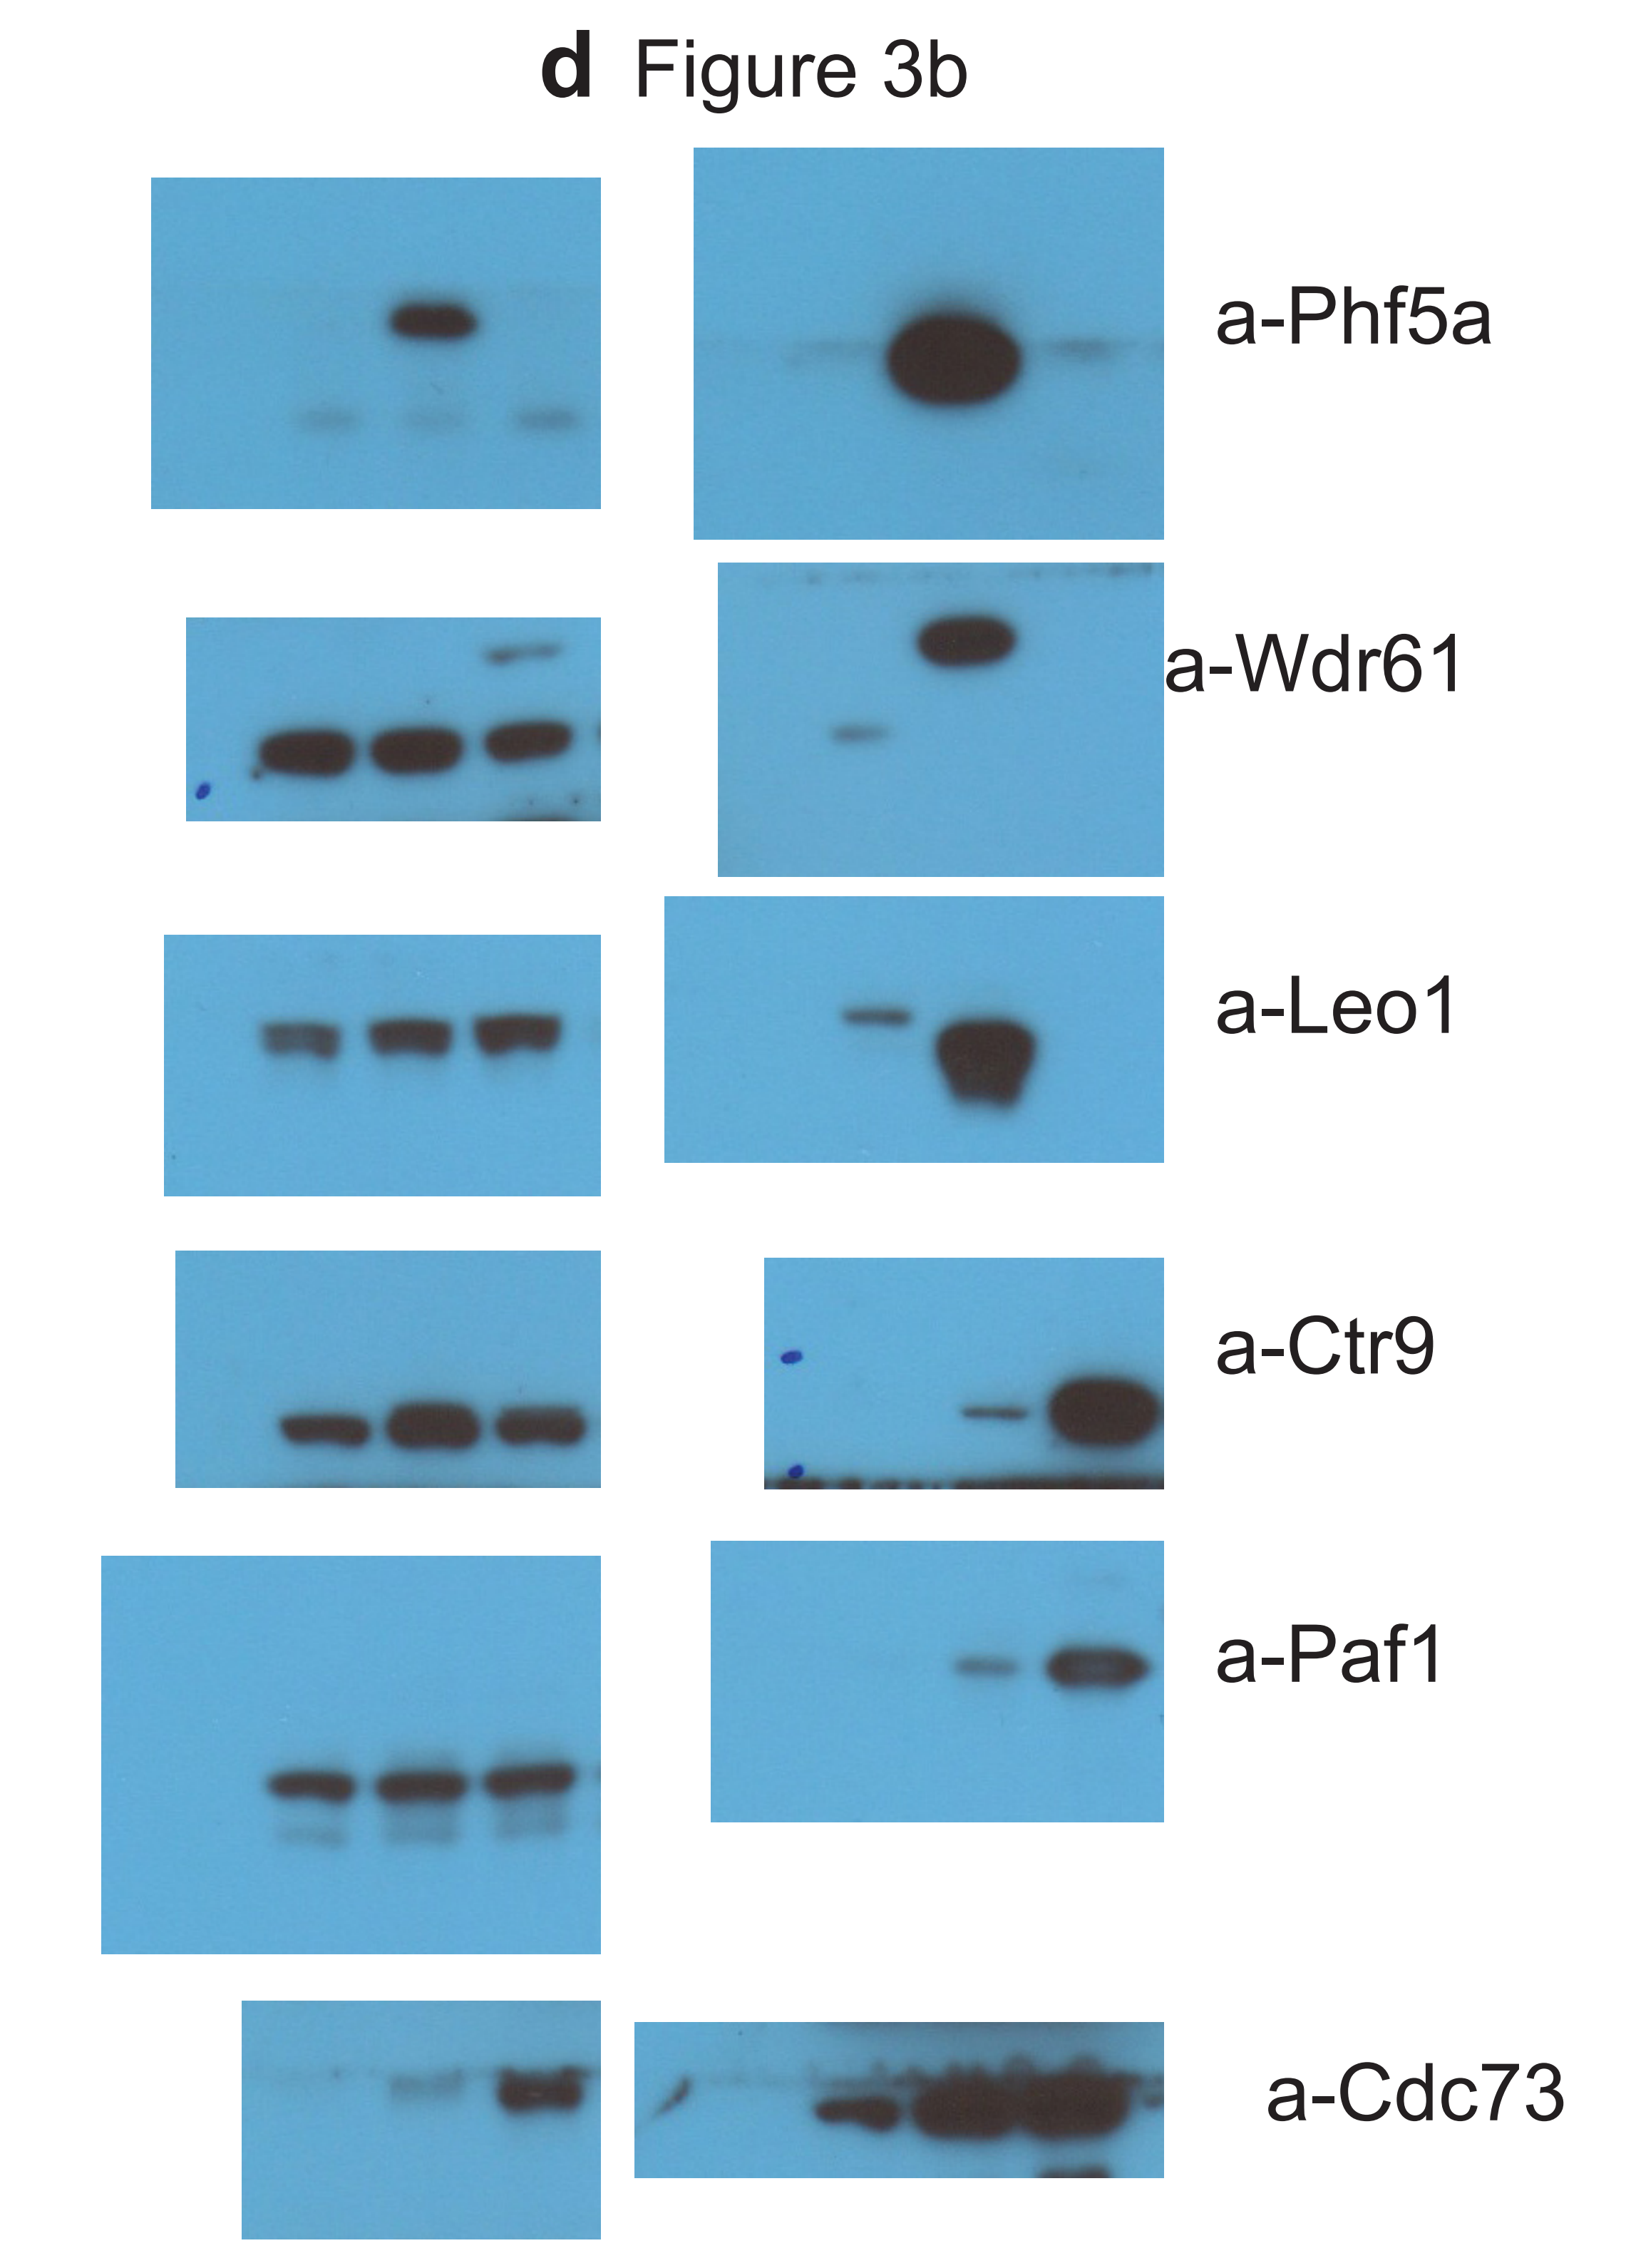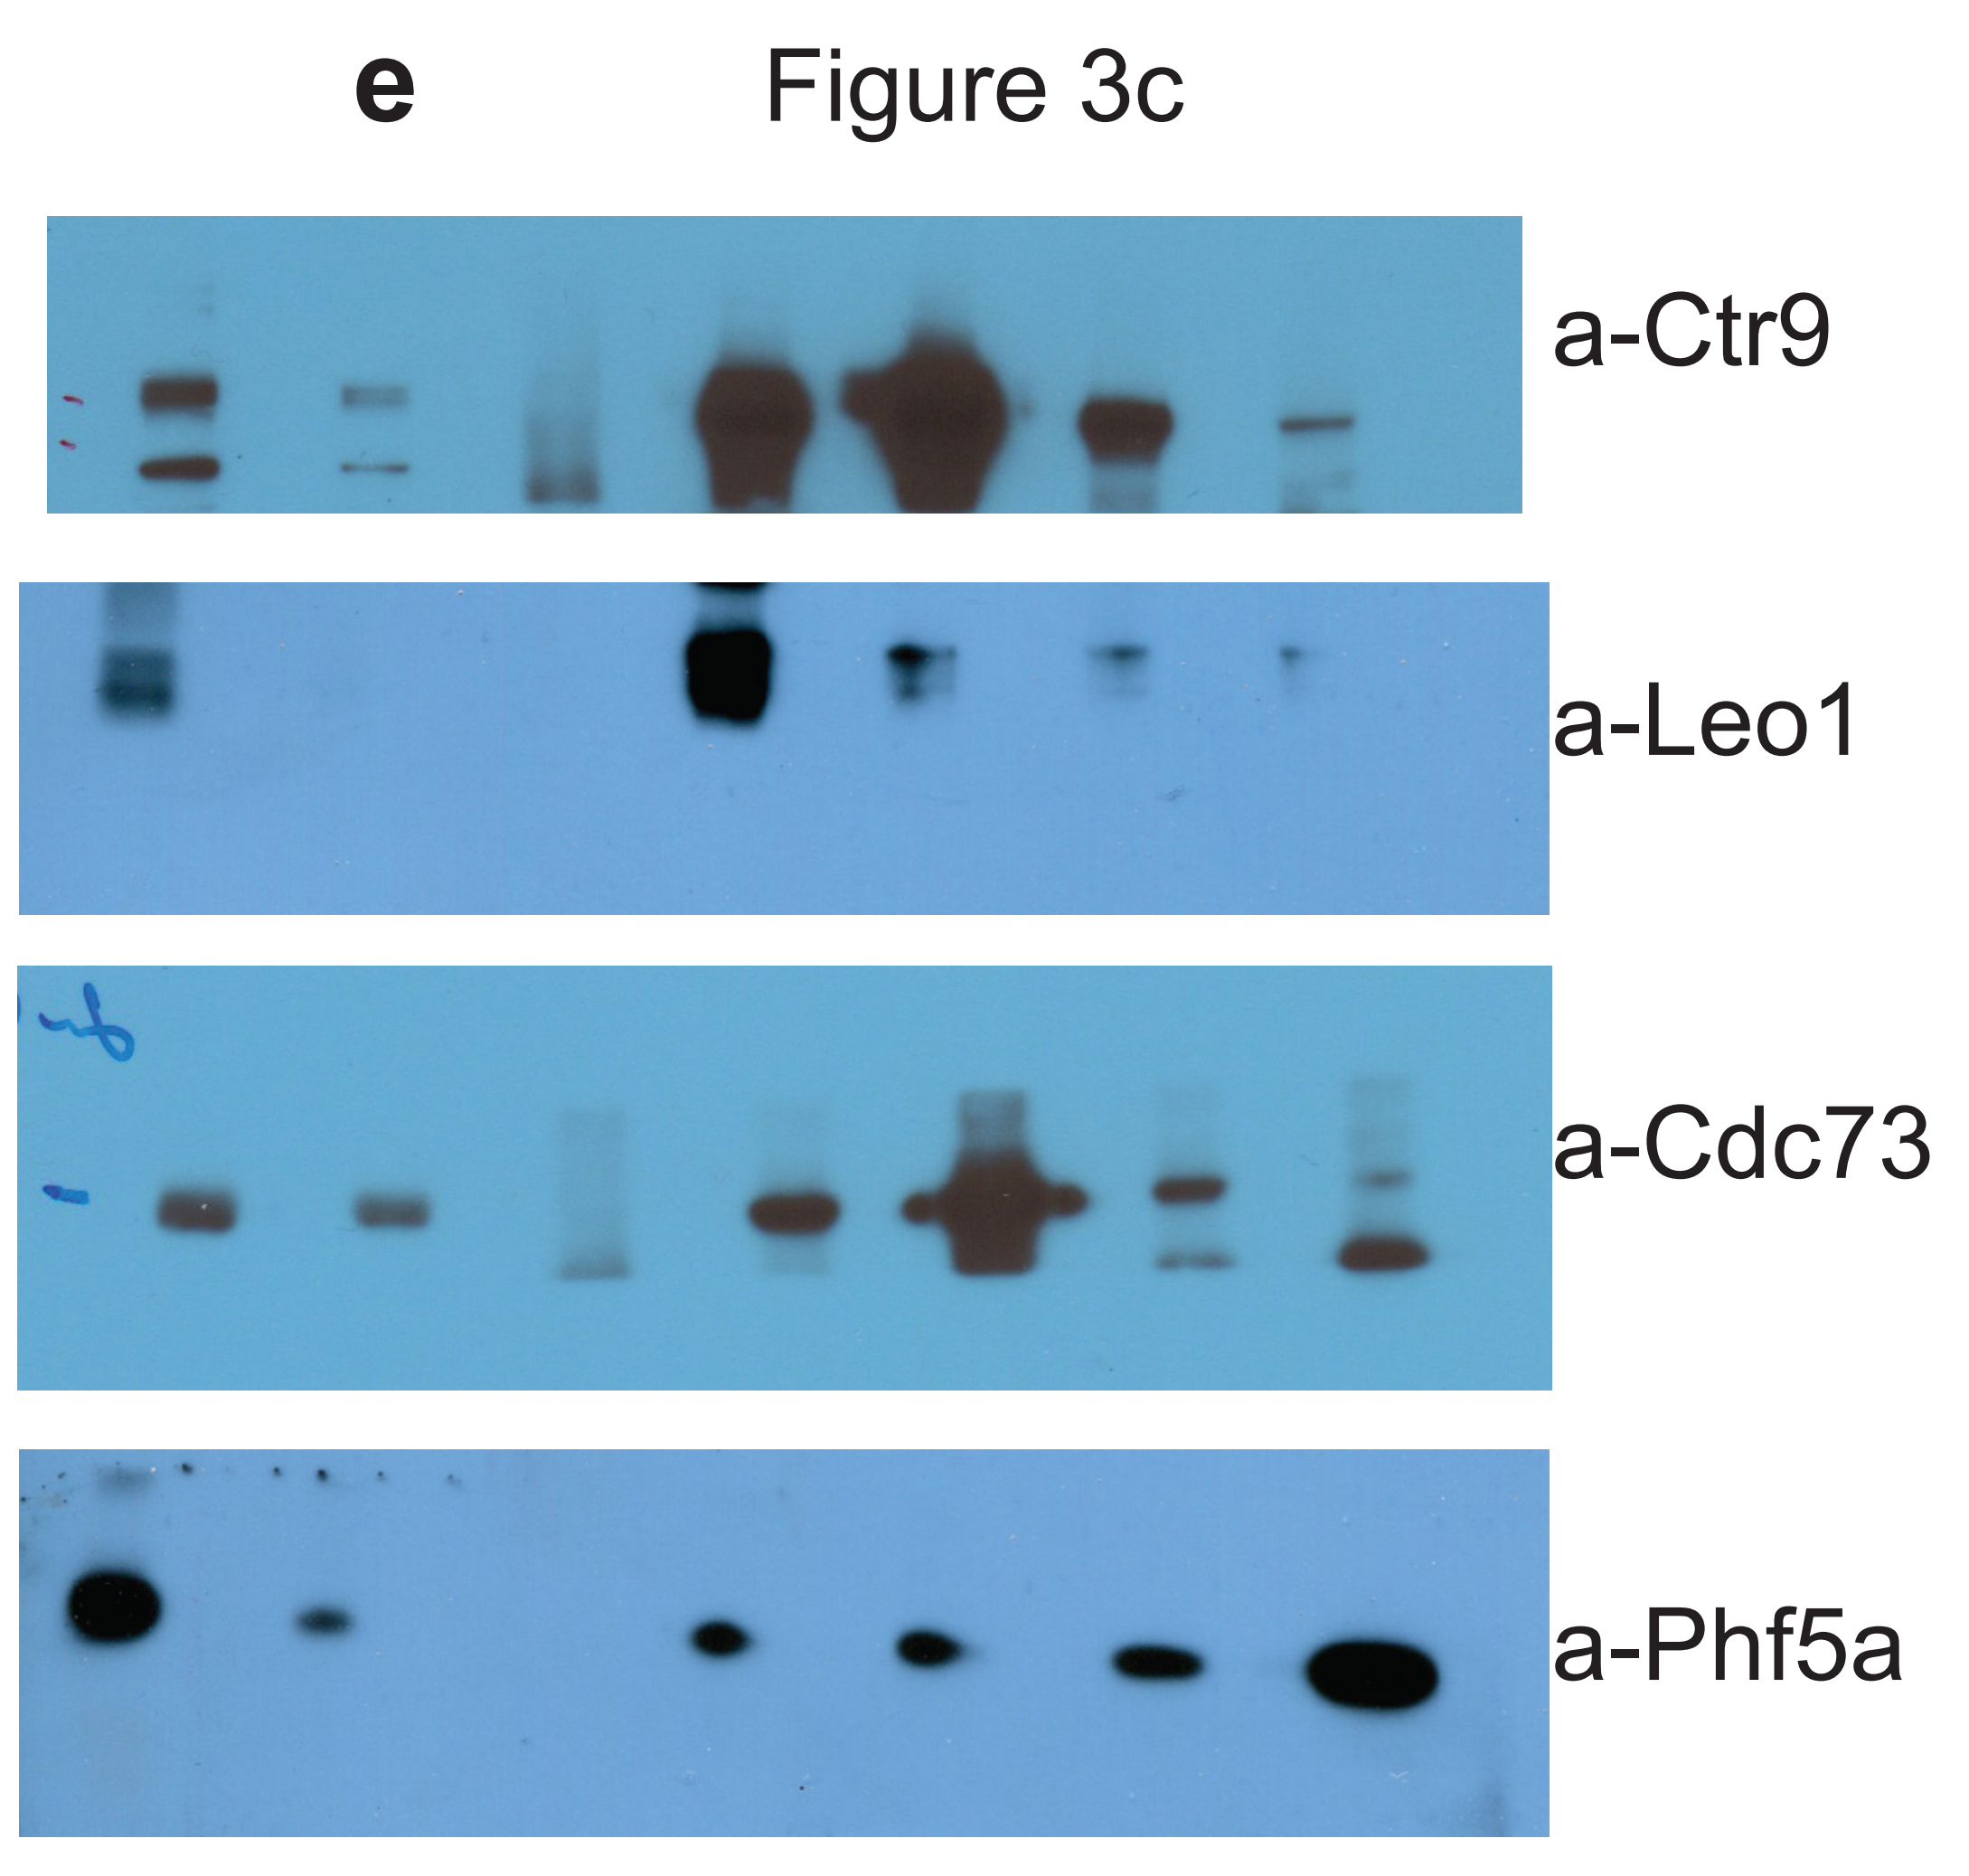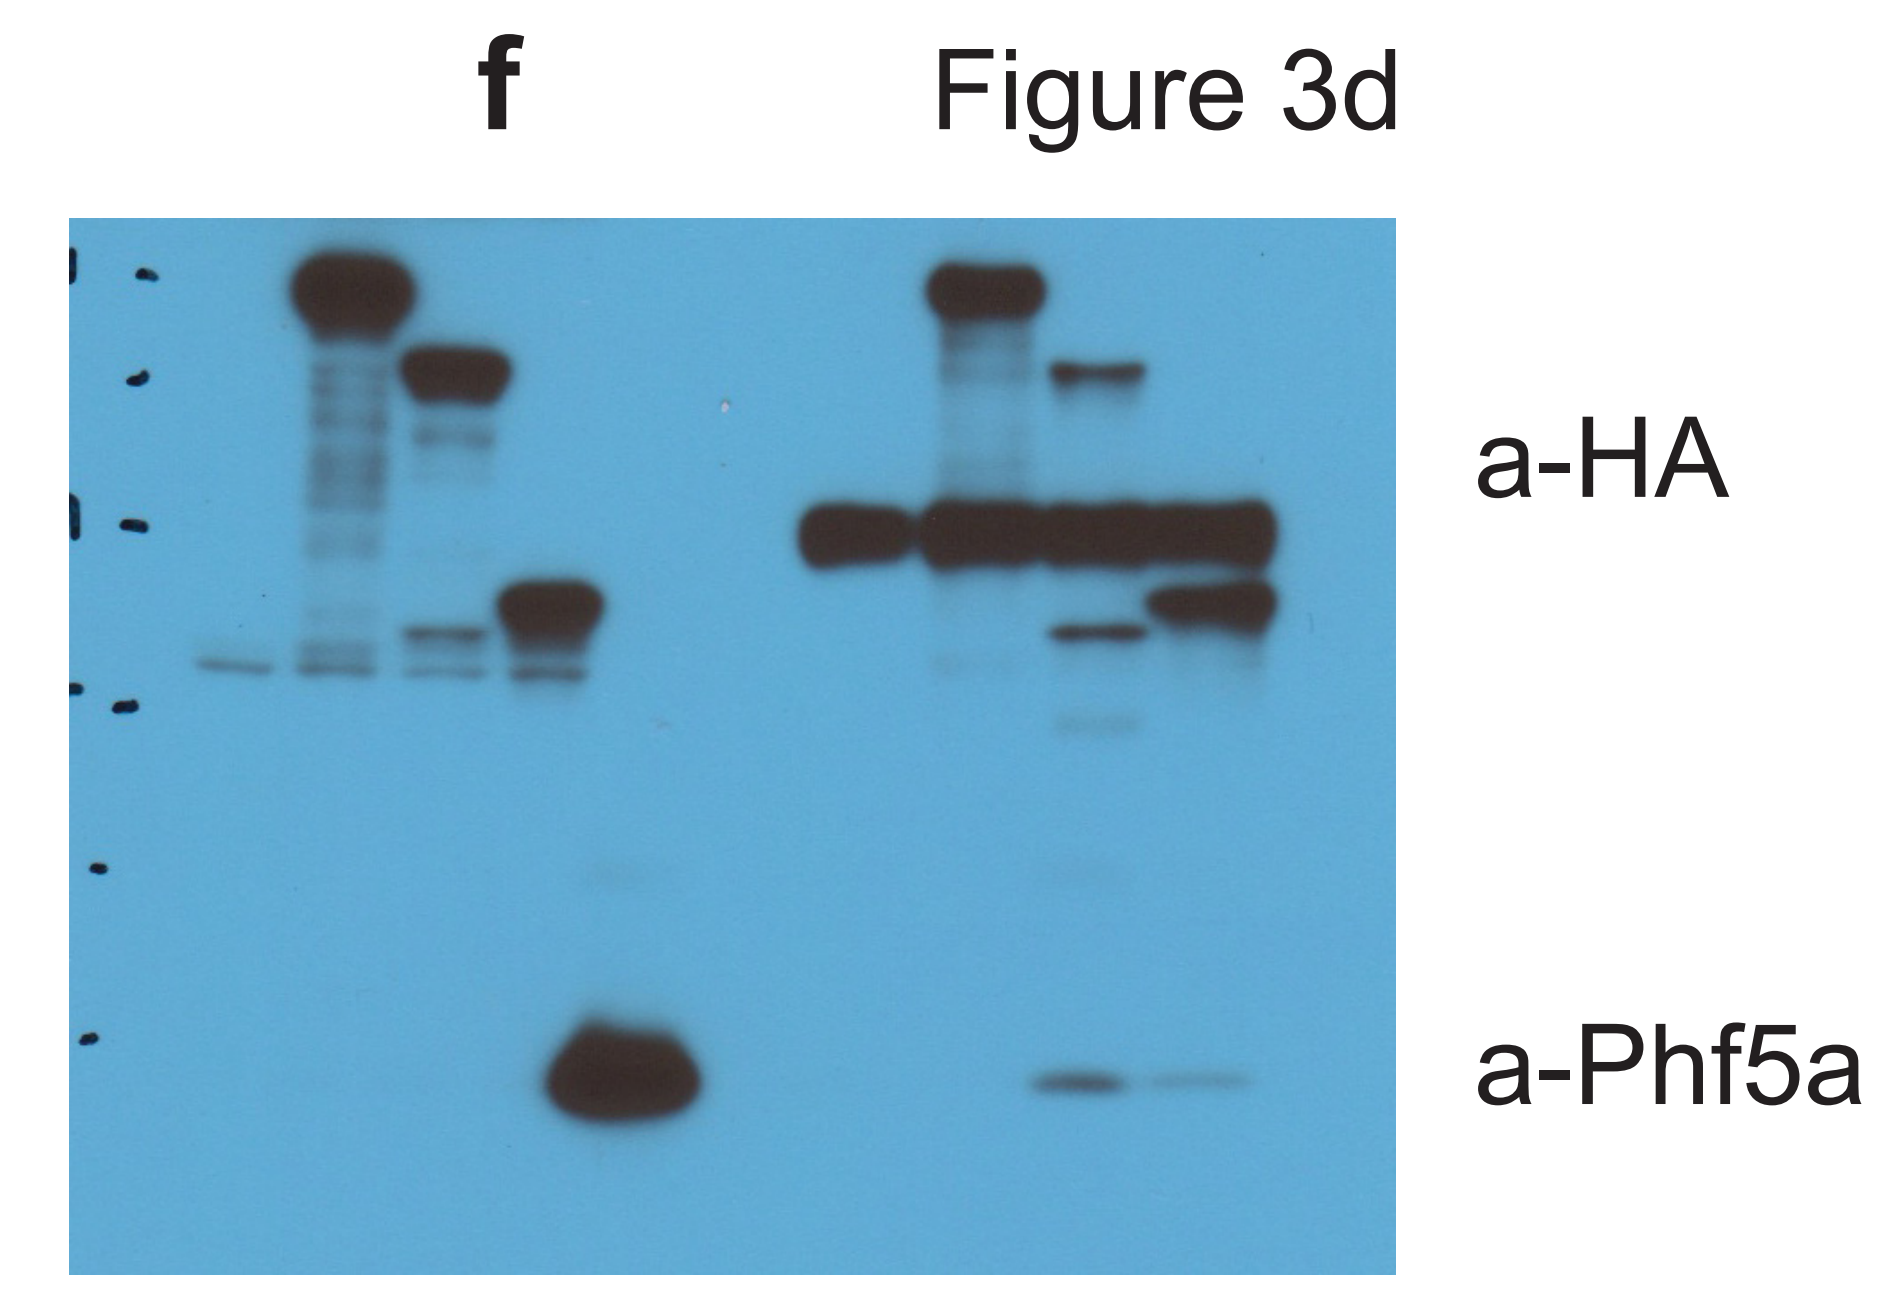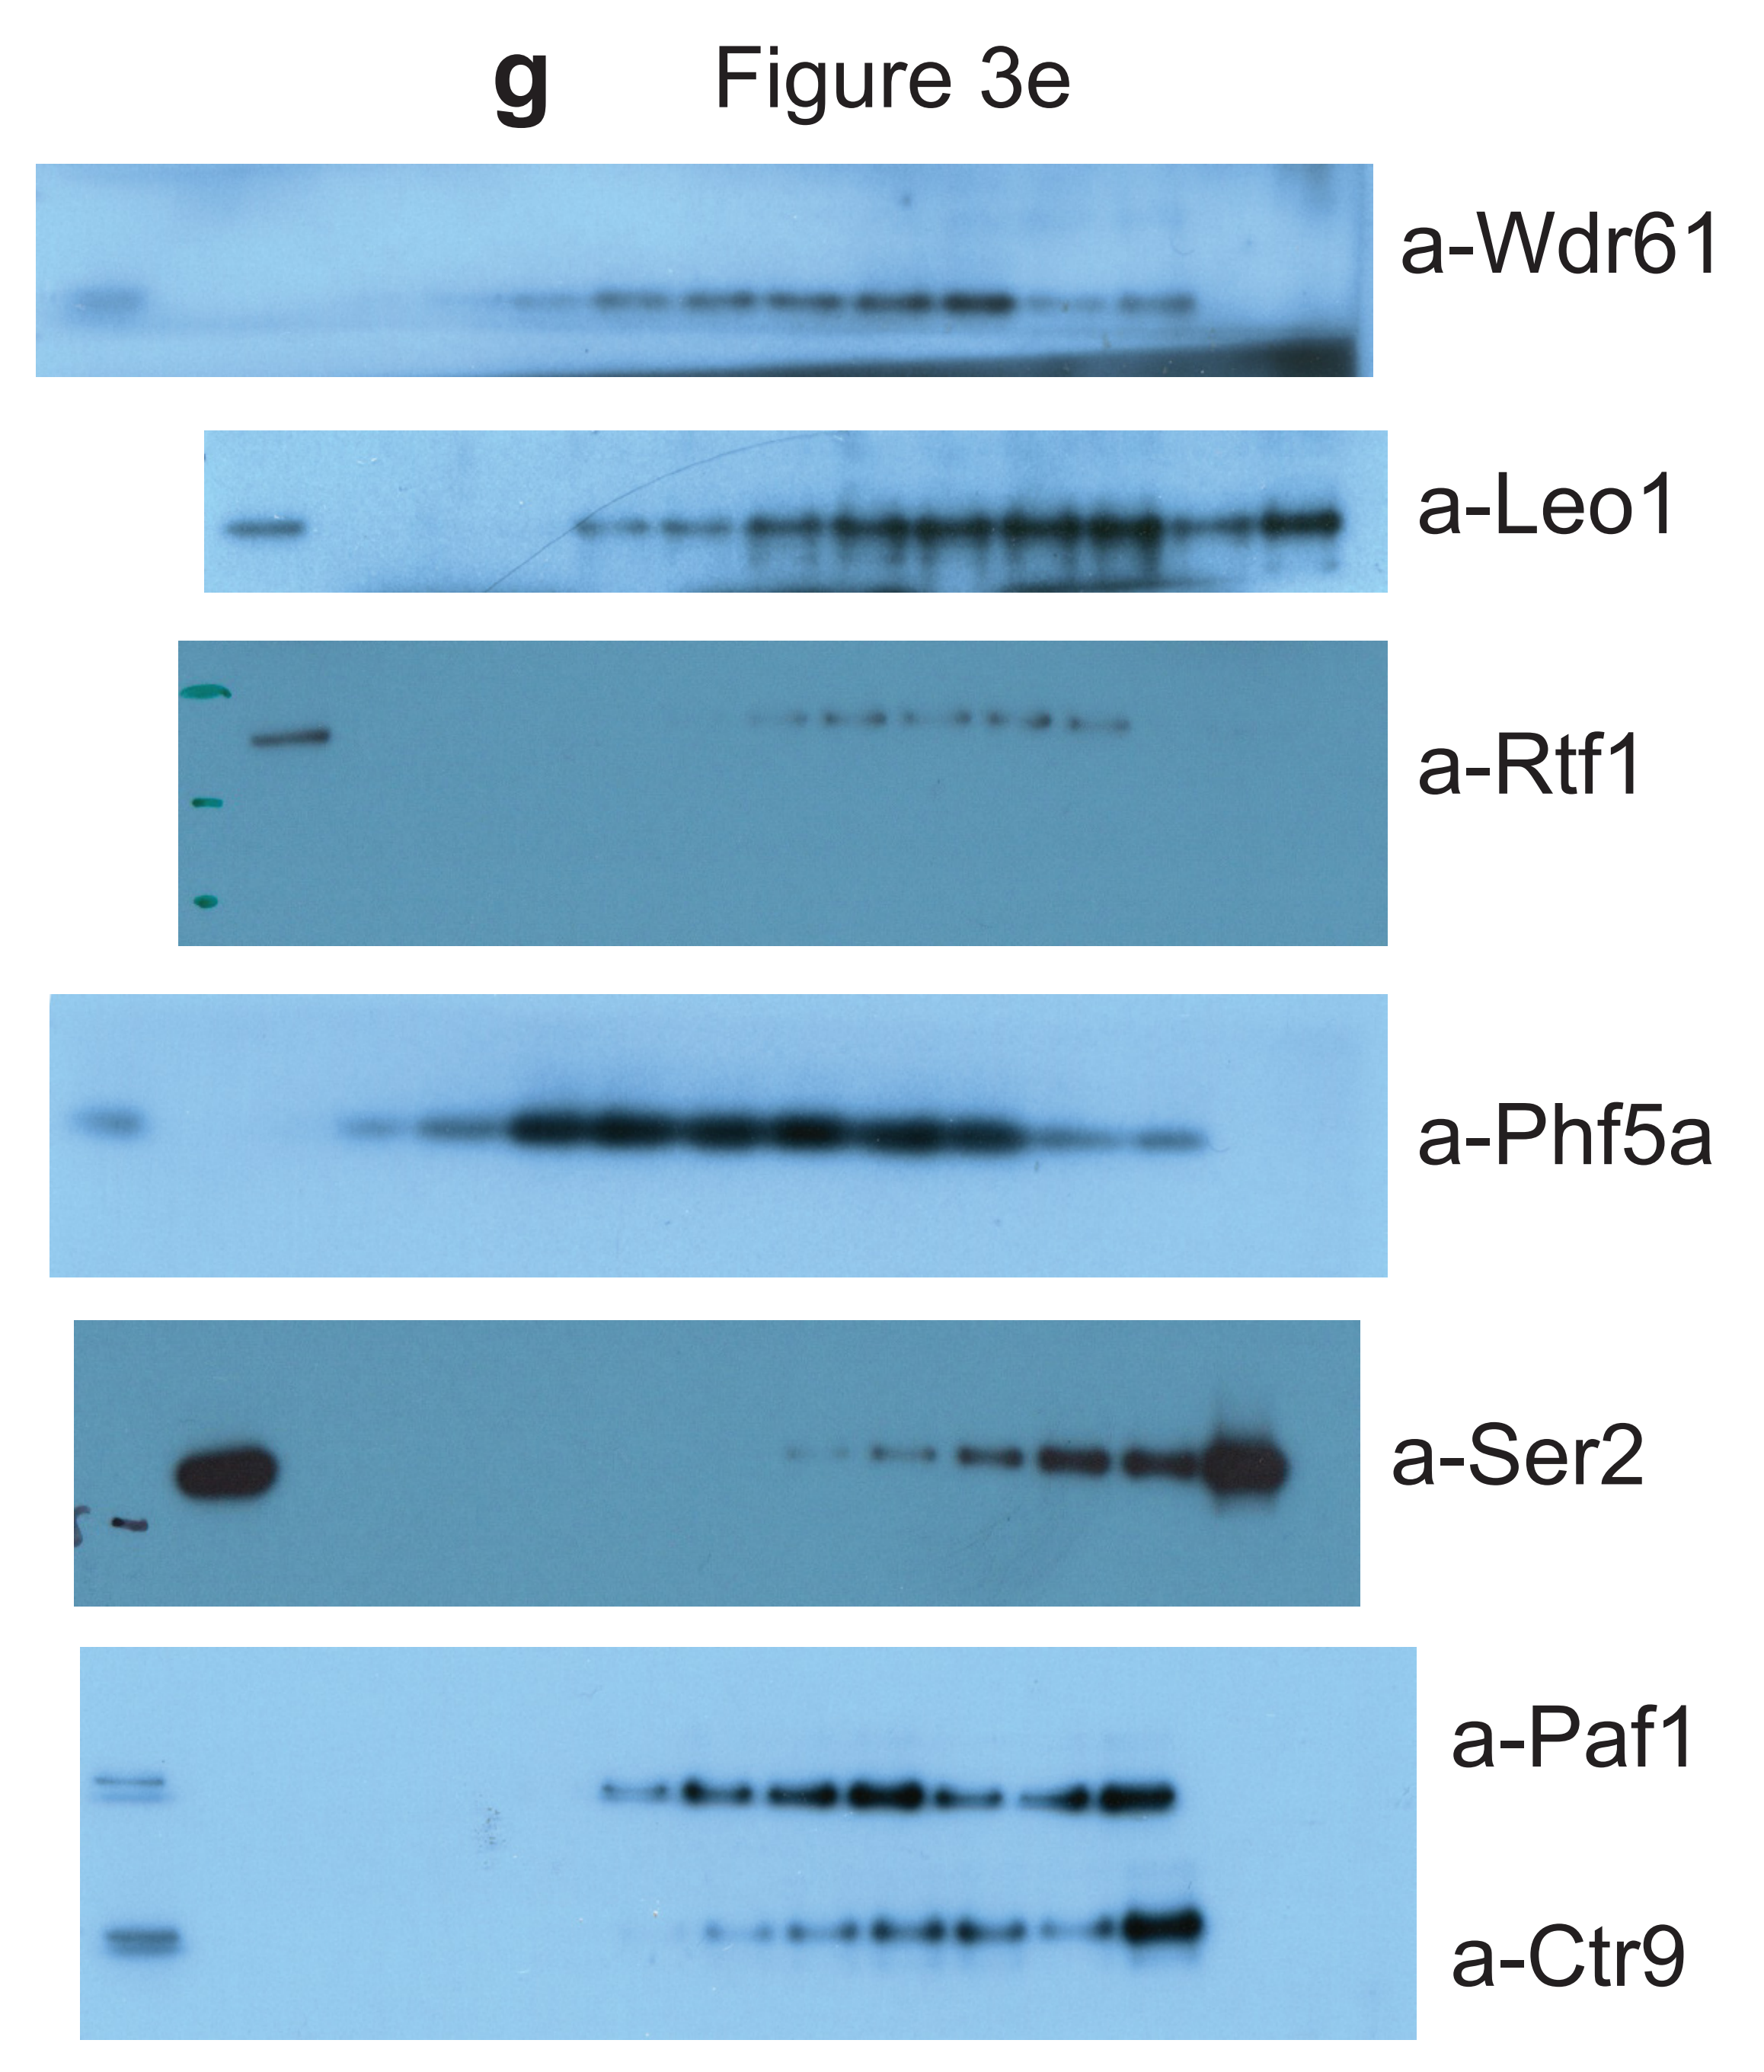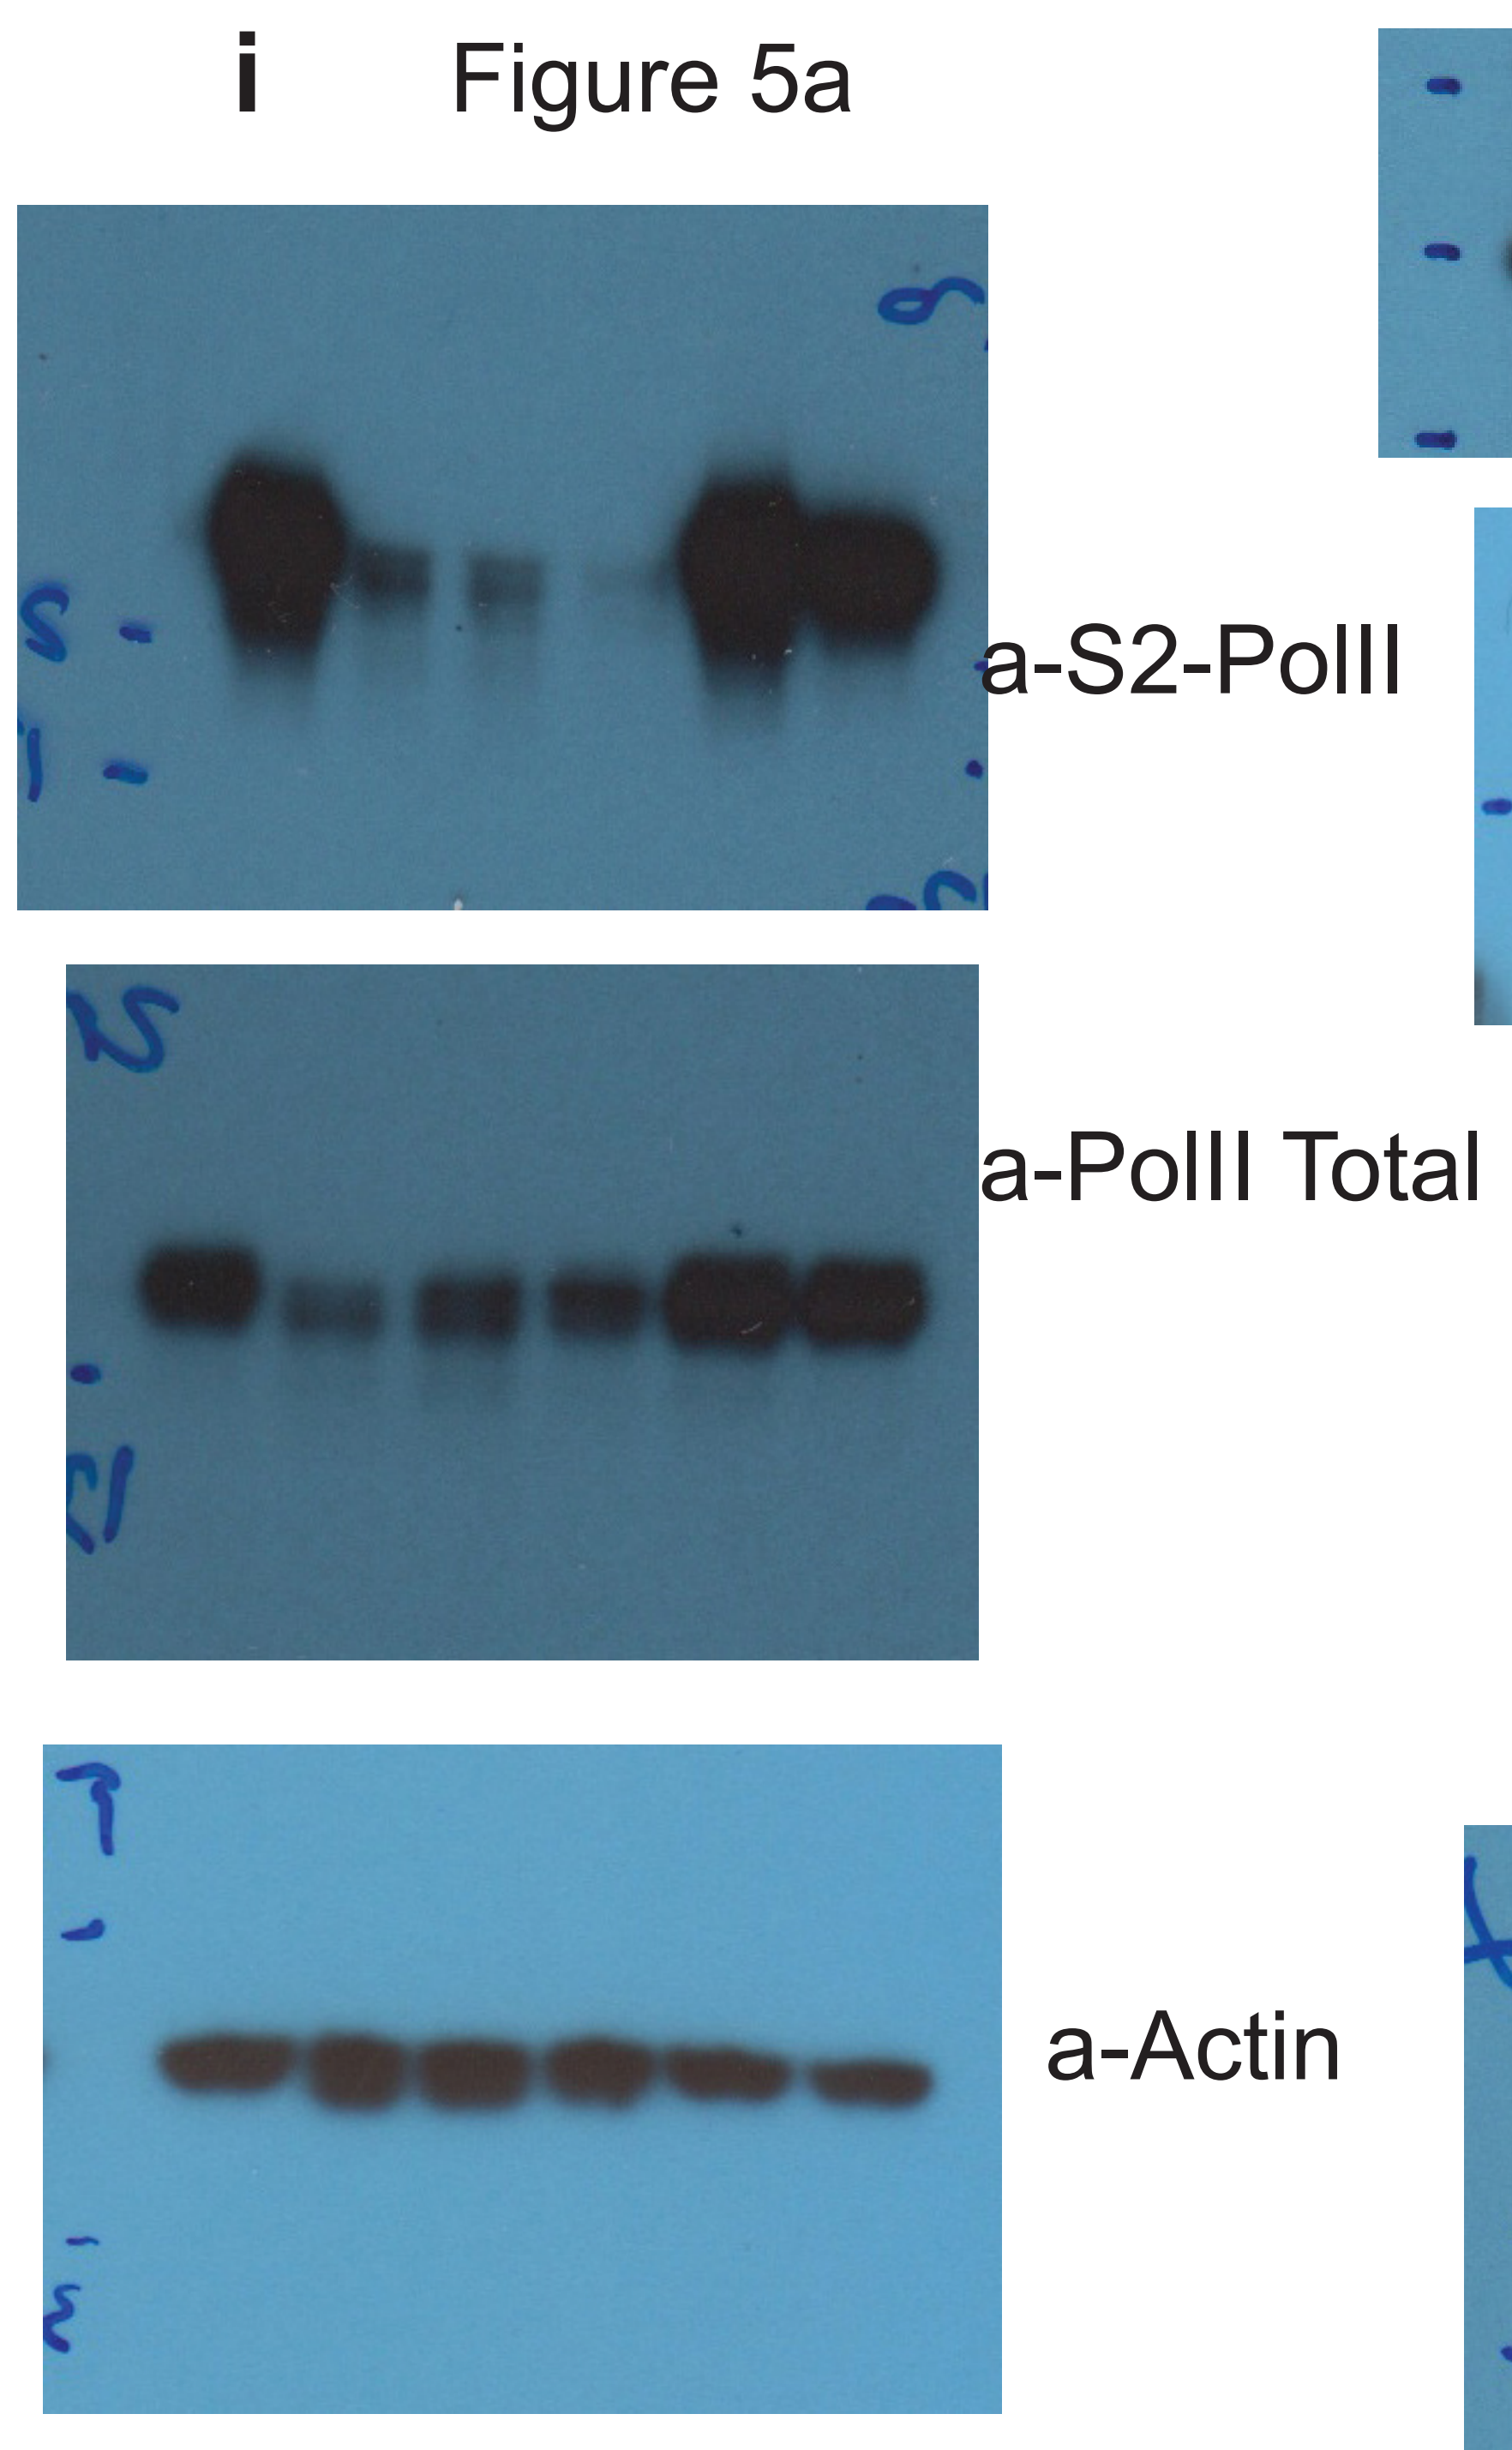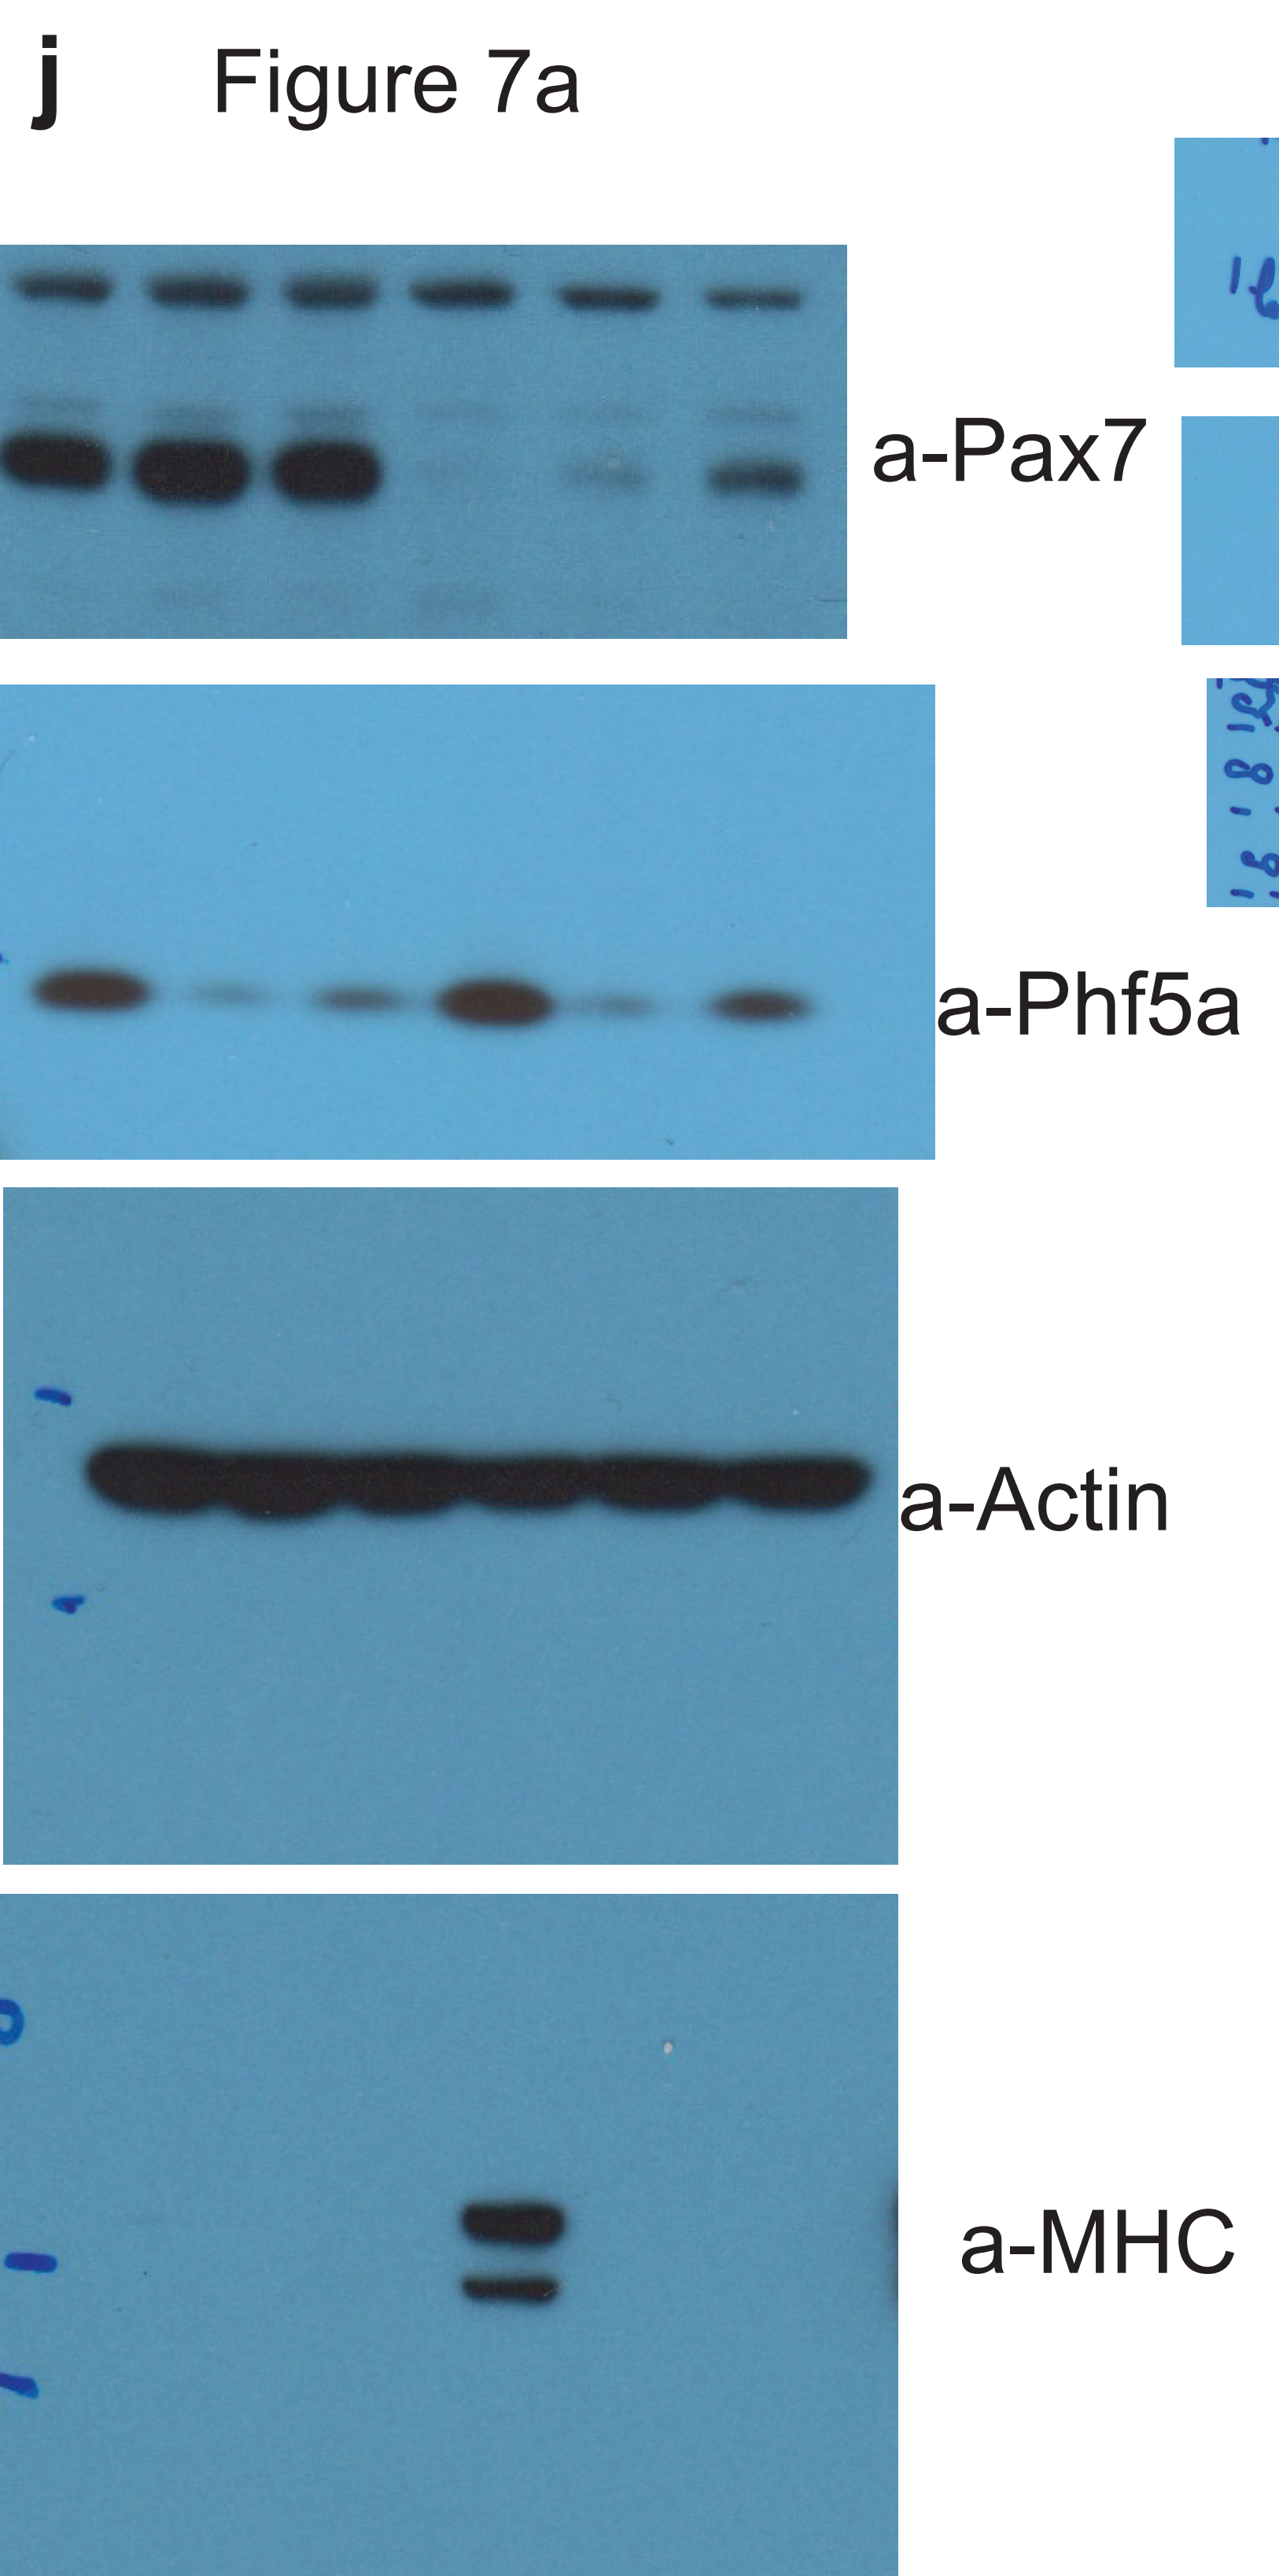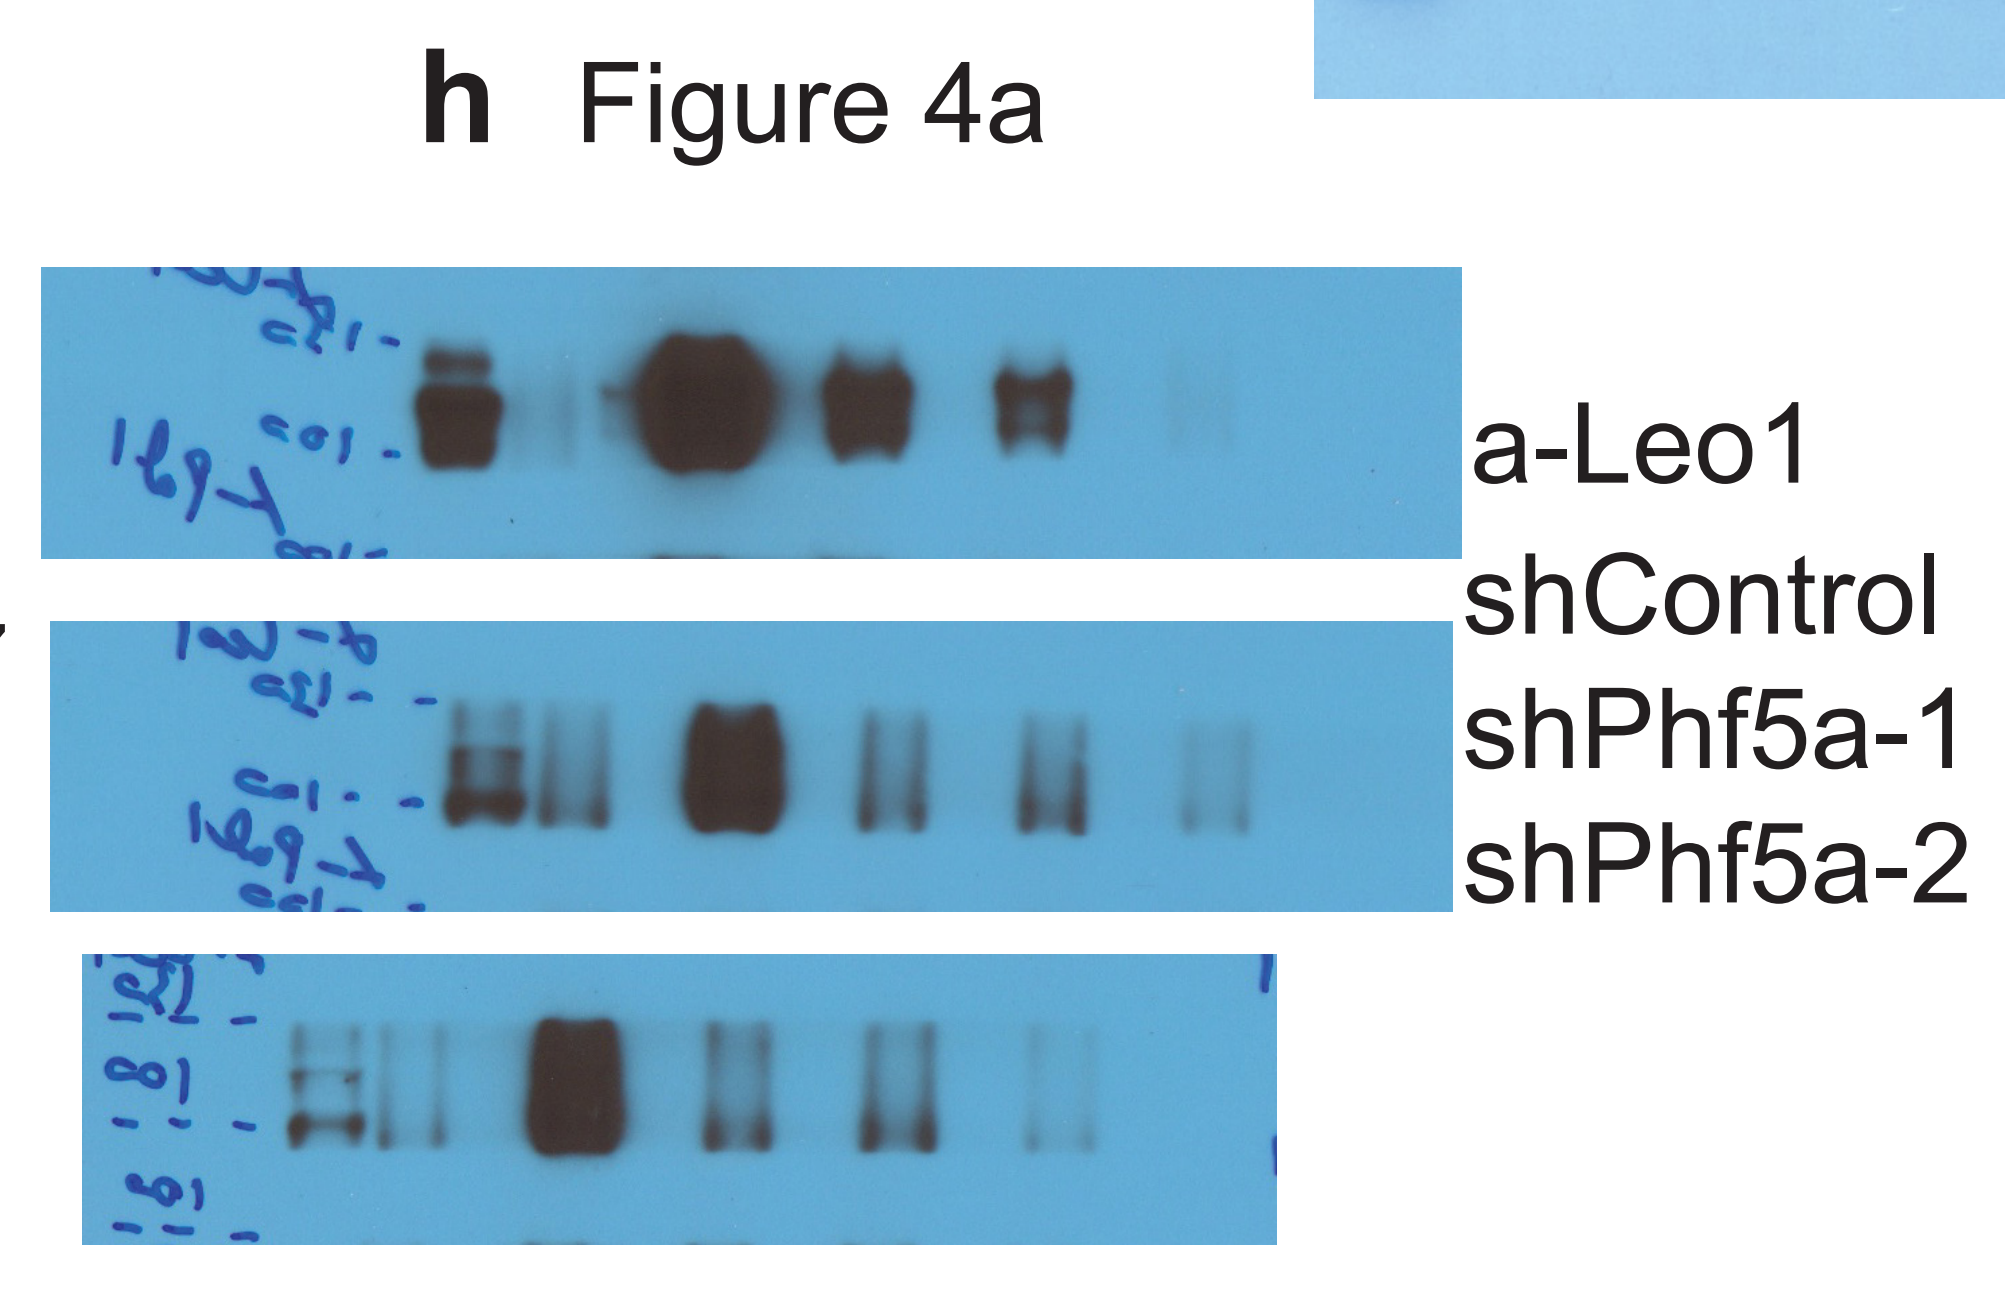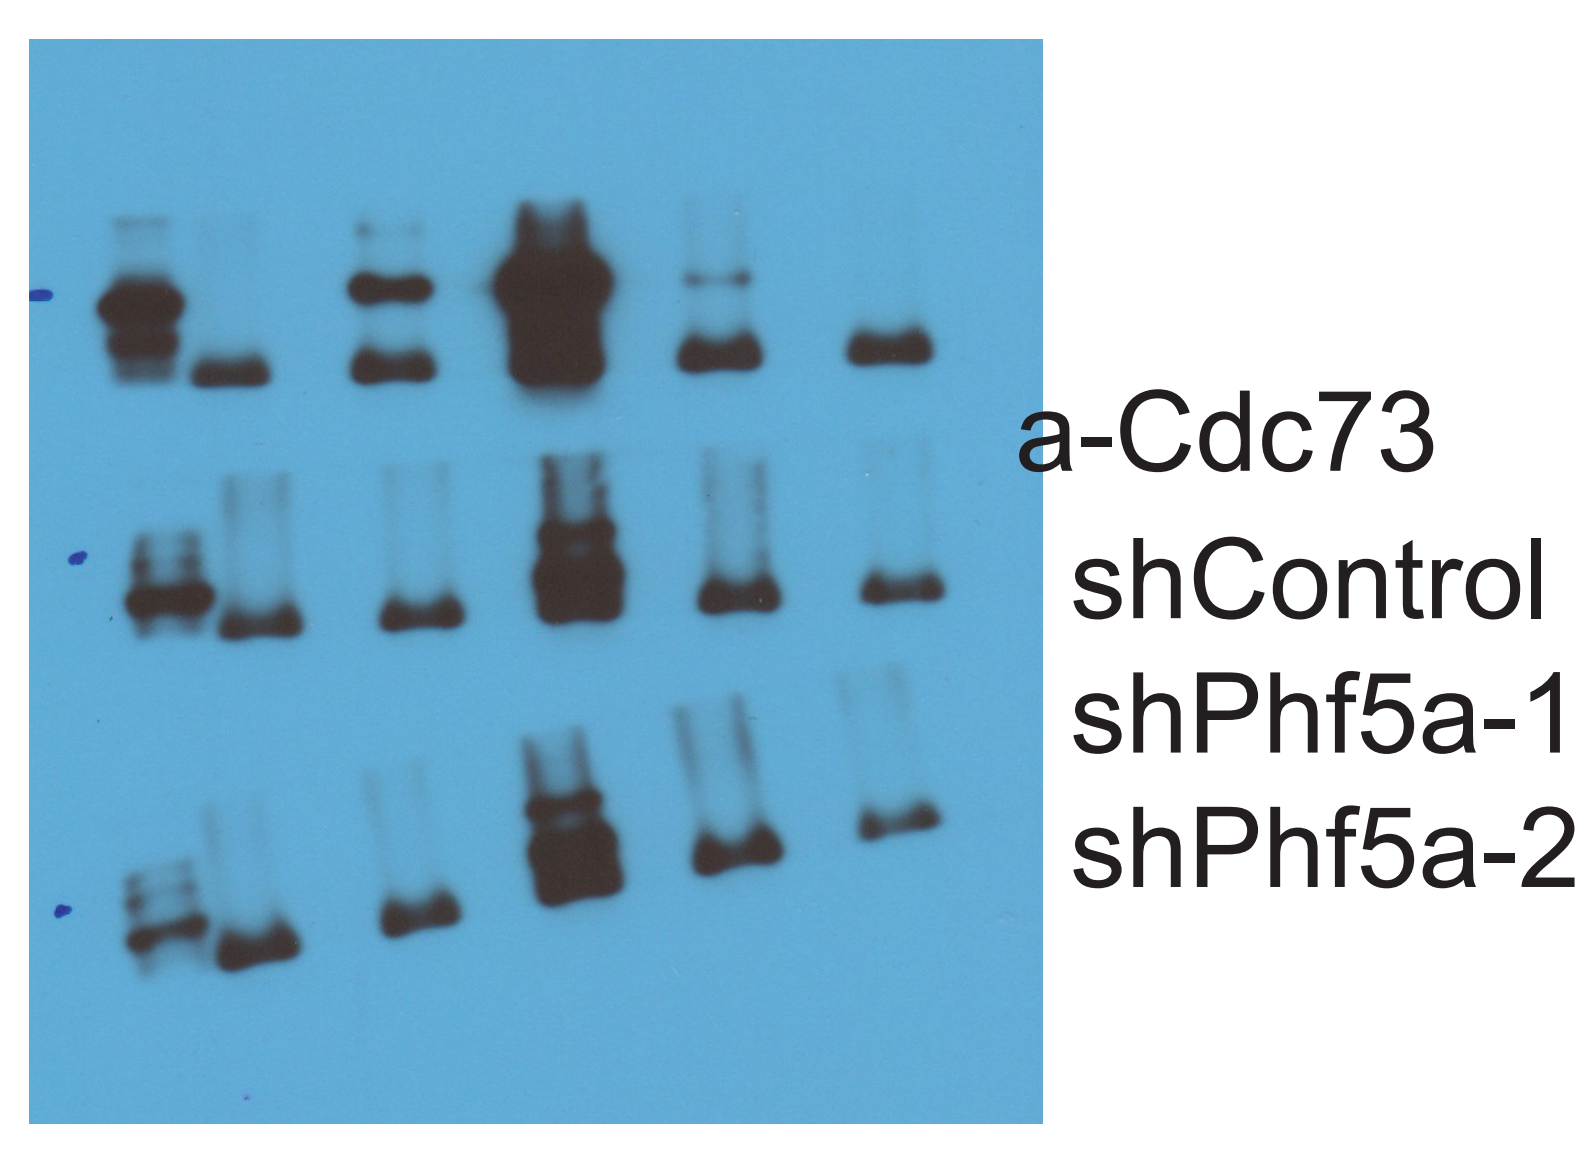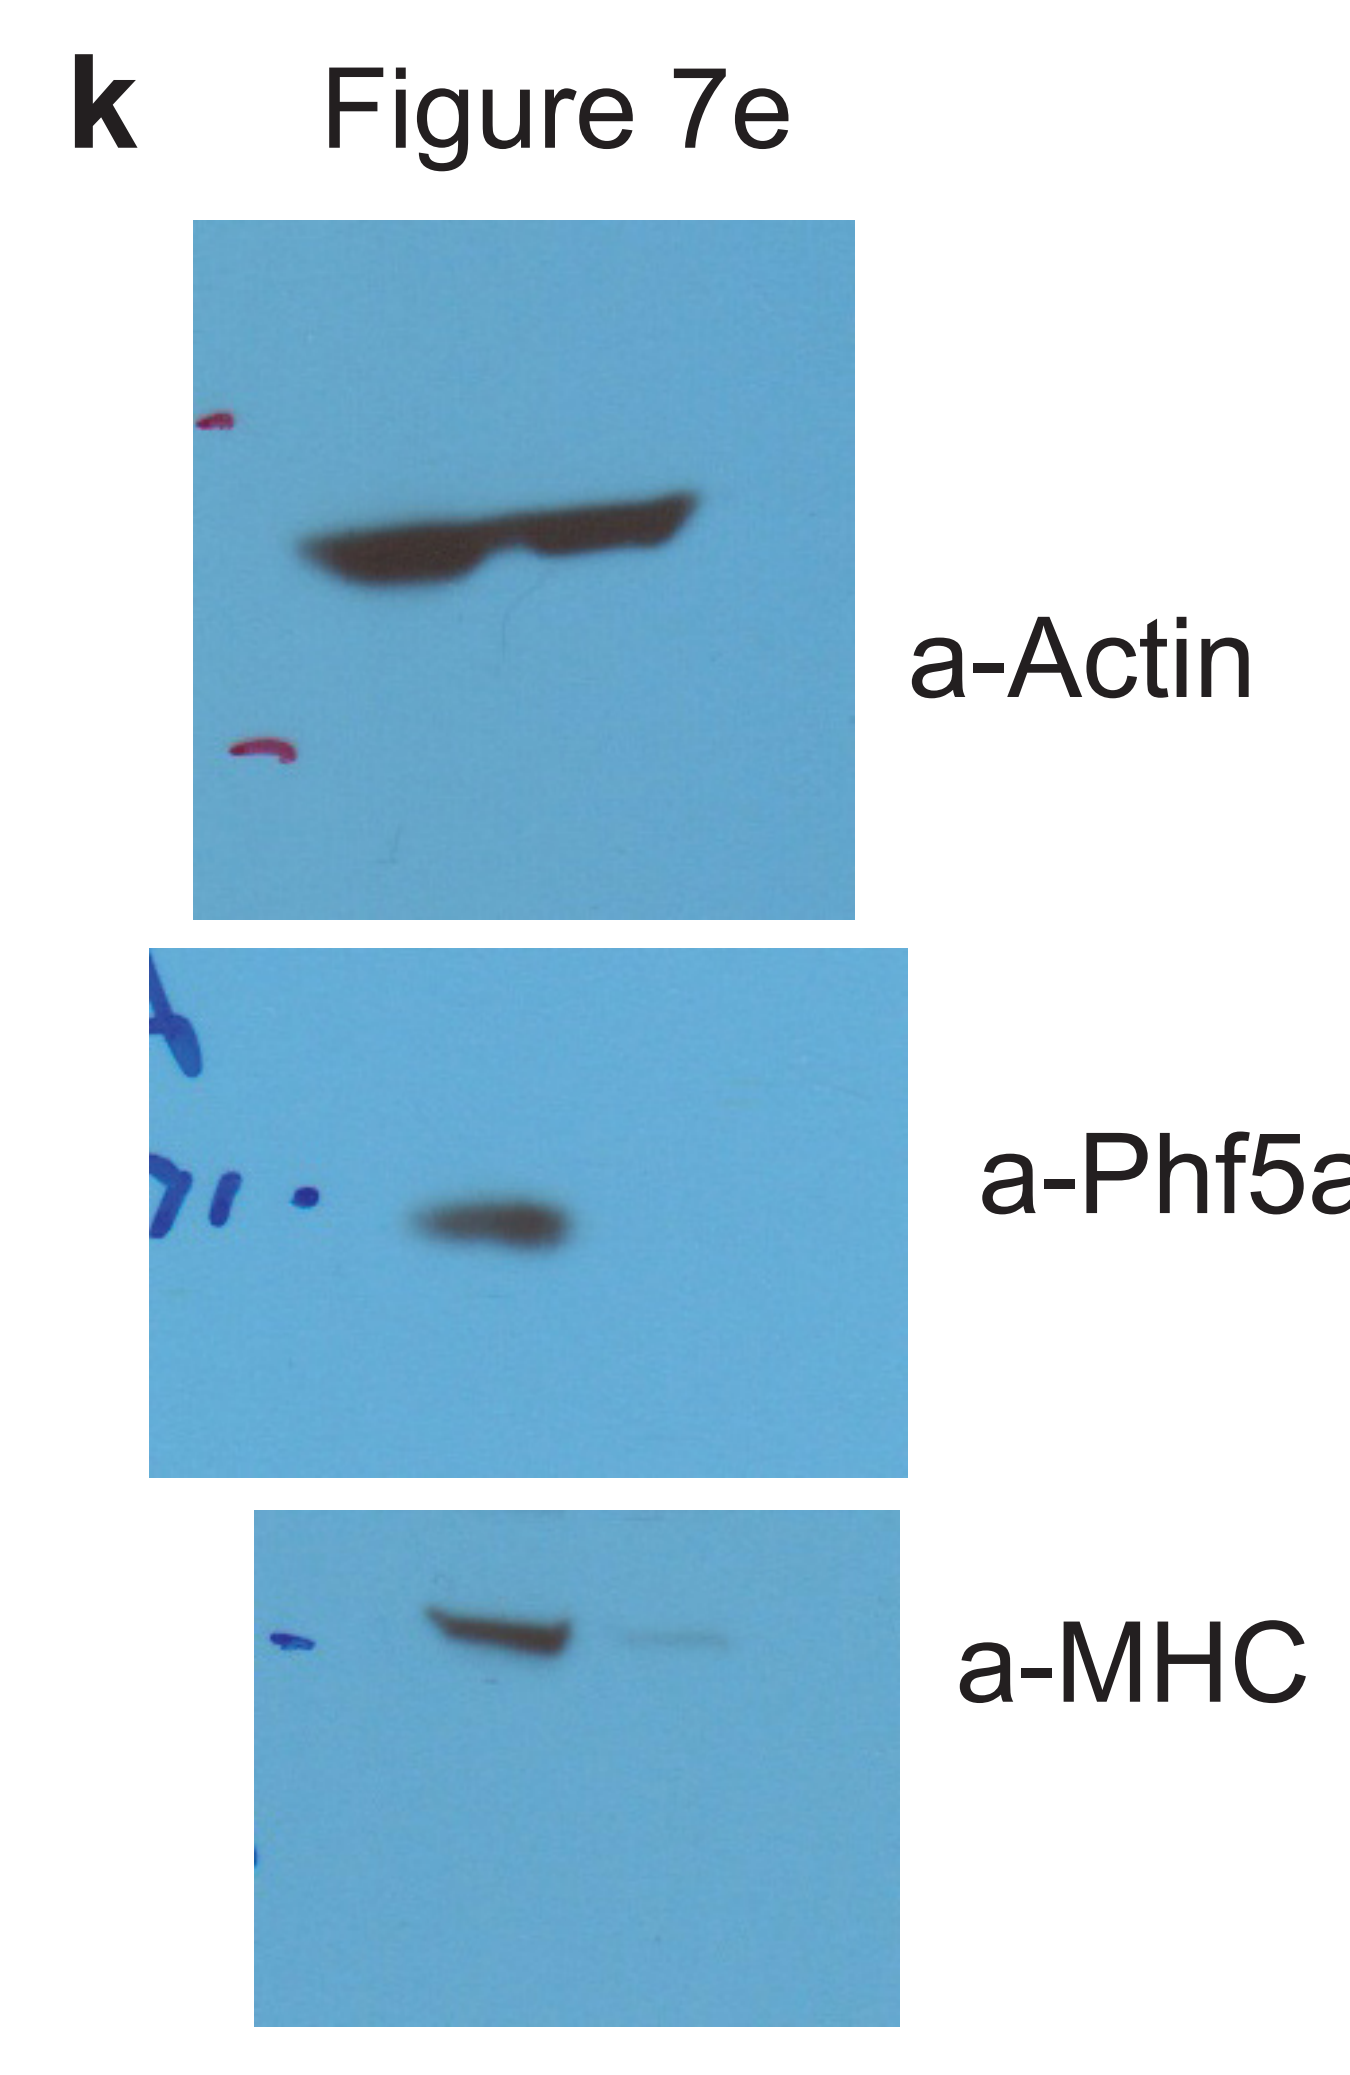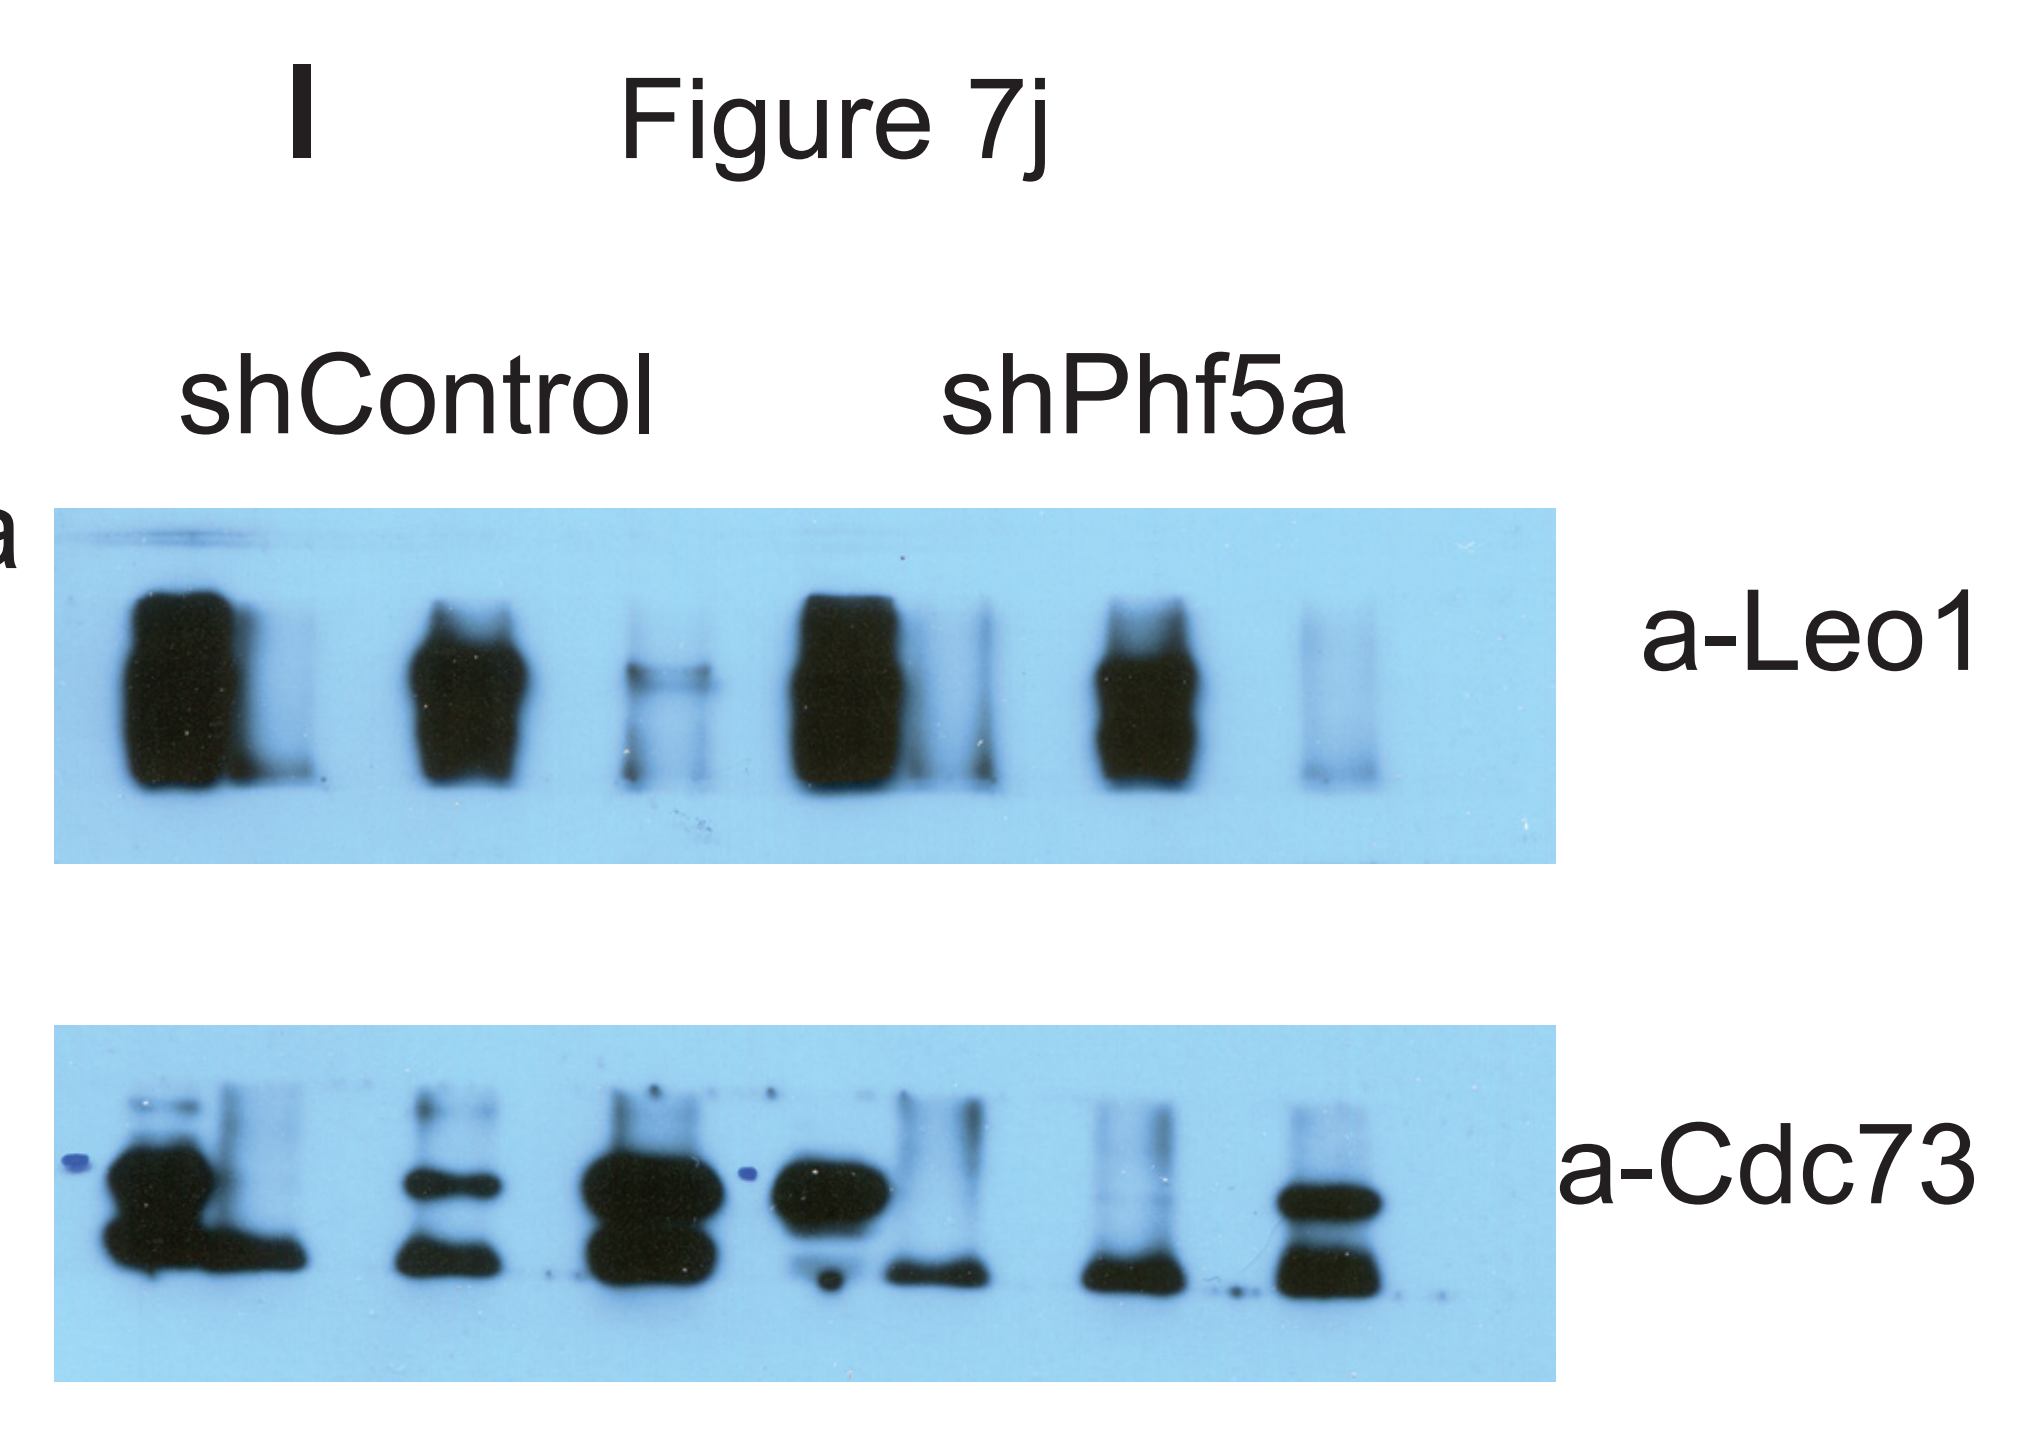

Supplement: NIHMS817260-supplement-8.pdf [file NIHMS817260-supplement-8.pdf]
